# Supplementary material
Source: HighWire-hosted journal article supplement (https://jitc.bmj.com/content/10/12/e005678)
Supplement: inline-supplementary-material-1 [file inline-supplementary-material-1.pdf]

**Supplementary Table S1.** List of all selected studies

| <b>First Author [#]<br/>Phase (study<br/>Identifier)<br/>N</b>            | <b>Indication<br/>Target</b> | <b>Co-stimulatory<br/>domains<br/>Gene delivery;<br/>scFV Origin</b> | <b>Reported outcomes</b>                                                                                            |
|---------------------------------------------------------------------------|------------------------------|----------------------------------------------------------------------|---------------------------------------------------------------------------------------------------------------------|
| Bishop M <sup>1</sup><br>Ph3 (NCT03570892)<br>N=322                       | LBCL<br>CD19                 | 4-1-BB<br>Lentivirus; Murine                                         | ORR, OS, EFS, peak expansion and persistence of CAR-Ts, AEs & onset of AEs                                          |
| Abramson JS <sup>2</sup><br>Ph1 (NCT02631044)<br>N=294                    | DLBCL<br>CD19                | 4-1-BB & CD3<br>no data                                              | ORR, onset of response, PFS, OS, duration of response, peak expansion and persistence of CAR-Ts, AEs & onset of AEs |
| Zhang X <sup>3</sup><br>Retrospective<br>analysis (NA)<br>N=254           | B-ALL<br>CD19                | 4-1-BB & CD28<br>No Data<br>No Data                                  | CR, onset of response, LFS, OS, duration of response, AEs & onset of AEs                                            |
| Munshi NC <sup>4</sup><br>Ph2 (NCT03361748)<br>N=140                      | Multiple myeloma<br>BCMA     | 4-1-BB & CD3<br>Lentivirus; Murine                                   | ORR, onset of response, PFS, OS, duration of response, peak expansion and persistence of CAR-Ts, AEs & onset of AEs |
| Kittai A <sup>5</sup><br>Retrospective<br>analysis (NA)<br>N=130          | DLBCL<br>No Data             | No Data<br>No Data<br>No Data                                        | ORR, CR, PFS, OS, & AEs                                                                                             |
| Neelapu SS <sup>6</sup><br>Ph2 (NCT02348216)<br>N=111                     | DLBCL<br>CD19                | CD28 & CD3<br>Retrovirus;<br>Murine                                  | ORR, PFS, OS, duration of response, peak expansion and persistence of CAR-Ts, AEs                                   |
| Berdeja JG <sup>7</sup><br>Ph1b/2<br>(NCT03548207)<br>N=97                | Multiple myeloma<br>BCMA     | 4-1-BB & CD3<br>Lentivirus; no<br>data                               | ORR, onset of response, PFS, OS, AEs & onset of AEs                                                                 |
| Fowler N <sup>8</sup><br>Ph2 (NCT03568461)<br>N=97                        | FL<br>CD19                   | 4-1-BB<br>Lentivirus; Murine                                         | OS, PFS, duration of response, AEs & onset of AEs                                                                   |
| Schuster SJ <sup>9</sup><br>Ph2 (NCT02445248)<br>N=93                     | DLBCL<br>CD19                | 4-1-BB & CD3<br>Lentivirus; Murine                                   | ORR, PFS, OS, duration of response, persistence of CAR-Ts, AEs                                                      |
| Itzhaki O <sup>10</sup><br>Ph1/2<br>(NCT02772198;<br>NCT00287131)<br>N=90 | ALL and NHL<br>CD19          | CD28 & CD3<br>Retrovirus;<br>Murine                                  | ORR                                                                                                                 |
| Li M <sup>11</sup><br>Ph1/2<br>(NCT03919240)<br>N=78                      | B-ALL<br>CD19                | CD28 & CD3<br>Lentivirus<br>Human                                    | CR, EFS, OS, peak expansion and persistence of CAR-Ts, AEs & onset of AEs                                           |

|                                                                            |                          |                                                         |                                                                                                                  |
|----------------------------------------------------------------------------|--------------------------|---------------------------------------------------------|------------------------------------------------------------------------------------------------------------------|
| Sesques P <sup>12</sup><br>Retrospective analysis (NA)<br>N=70             | DLBCL<br>CD19            | 4-1-BB/CD28 & CD3<br>Retro & Lentivirus;<br>both murine | ORR, PFS, OS, duration of response, AEs & onset of AEs                                                           |
| Wang M <sup>13</sup><br>Ph2 (NCT02601313)<br>N=68                          | MCL<br>CD19              | CD28 & CD3<br>Retrovirus;<br>Murine                     | ORR, PFS, OS, peak expansion and persistence of CAR-Ts, AEs & onset of AEs                                       |
| Ying Z <sup>14</sup><br>Ph1 (NCT04089215)<br>N=59                          | B-cell lymphoma<br>CD19  | 4-1-BB & CD3<br>Lentivirus; Murine                      | BOR, onset of response, PFS, OS, duration of response, peak expansion and persistence of CAR-Ts, AEs             |
| Zhao WH <sup>15</sup><br>Ph1 (NCT03090659)<br>N=57                         | Multiple myeloma<br>BCMA | CD28 & CD3<br>Lentivirus; Camel                         | ORR, PFS, OS, duration of response, persistence of CAR-Ts & AEs                                                  |
| Shah BD <sup>16</sup><br>Ph2 (NCT02614066)<br>N=55                         | B-ALL<br>CD19            | CD28 & CD3<br>Retrovirus;<br>Murine                     | OCR, CR, onset of response, RFS, duration of response, peak expansion, persistence of CAR-Ts, AEs & onset of AEs |
| Shah BD <sup>17</sup><br>Ph1/2<br>(NCT02614066)<br>N=54                    | ALL<br>CD19              | CD28 & CD3<br>Retrovirus;<br>Murine                     | ORR, RFS, OS, duration of response, peak expansion and persistence of CAR-Ts, AEs & onset of AEs                 |
| Jiang H <sup>18</sup><br>Ph1/2<br>(NCT02965092)<br>N=53                    | B-ALL<br>CD19            | 4-1-BB & CD3<br>Lentivirus; no data                     | ORR, onset of response, OS, duration of response, peak expansion and persistence of CAR-Ts & AEs                 |
| Park JH <sup>19</sup><br>Ph1 (NCT01044069)<br>N=53                         | B-ALL<br>CD19            | CD28 & CD3<br>Retrovirus;<br>Murine                     | ORR, EFS, OS, persistence of CAR-Ts, & AEs                                                                       |
| <b>Studies with cohort size ≤50 treated patients</b>                       |                          |                                                         |                                                                                                                  |
| Summers C <sup>20</sup><br>Ph1/2<br>(NCT02028455)<br>N=50                  | B-ALL<br>CD19            | 4-1-BB; No Data                                         | CR, LFS, OS, onset of response & AEs                                                                             |
| Ramos CA <sup>21</sup><br>Ph1 (NCT01316146)<br>N=41                        | HL<br>CD30               | No Data                                                 | ORR, PFS, OS, peak expansion and persistence of CAR-Ts, AEs & onset of AEs                                       |
| Wudhikarn K <sup>22</sup><br>Ph1 (NCT01044069)<br>N=38                     | B-ALL<br>CD19            | No Data                                                 | CR, EFS, OS, duration of response, AEs & onset of AEs                                                            |
| Shao M <sup>23</sup><br>Retrospective analysis<br>ChiCTR1800017404<br>N=37 | Multiple myeloma<br>BCMA | 4-1-BB; Lentivirus                                      | ORR & AEs                                                                                                        |
| Frey NV <sup>24</sup>                                                      | ALL                      | 4-1-BB; Lentivirus                                      | ORR, EFS, OS, & AEs                                                                                              |

|                                                                                |                          |                                                     |                                                                                                    |
|--------------------------------------------------------------------------------|--------------------------|-----------------------------------------------------|----------------------------------------------------------------------------------------------------|
| Ph2 (NCT01029366;<br>NCT02030847)<br>N=35                                      | CD19                     |                                                     |                                                                                                    |
| Pan J <sup>25</sup><br>Ph1 (ChiCTR-OIC-<br>17013523)<br>N=34                   | B-ALL<br>CD22            | 4-1-BB; Lentivirus                                  | ORR, 1-yr leukemia-free survival<br>rate, AEs & onset of AEs                                       |
| Raje N <sup>26</sup><br>Ph1 (NCT02658929)<br>N=33                              | Multiple myeloma<br>BCMA | 4-1-BB; Lentivirus                                  | ORR, PFS, duration of response,<br>peak expansion and persistence<br>of CAR-Ts, AEs & onset of AEs |
| Turtle CJ <sup>27</sup><br>Ph1 (NCT01865617)<br>N=32                           | NHL<br>CD19              | 4-1-BB; Lentivirus                                  | ORR, PFS, OS, persistence of CAR-<br>Ts, AEs                                                       |
| Frey NV <sup>28</sup><br>Ph1 (NCT01747486)<br>N=32                             | CLL<br>CD19              | 4-1-BB; Lentivirus                                  | ORR, PFS, OS, persistence of CAR-<br>Ts, AEs                                                       |
| An F <sup>29</sup><br>Ph2 (NCT02735291)<br>N=30 (adults)                       | B-ALL<br>CD19            | CD28; Retrovirus                                    | ORR, RFS, OS, persistence of CAR-<br>Ts, AEs                                                       |
| Li C <sup>30</sup><br>Ph1 (ChiCTR-<br>OPC16009113)<br>N=30                     | MM and PCL<br>BCMA       | CD28; Lentivirus                                    | ORR, CR, PFS, OS, duration of<br>response, AEs & onset of AEs                                      |
| Turtle CJ <sup>31</sup><br>Ph1 (NCT01865617)<br>N=29                           | B-ALL<br>CD19            | 4-1-BB; Lentivirus                                  | ORR, peak expansion and<br>persistence of CAR-Ts & AEs                                             |
| Schuster SJ <sup>32</sup><br>Case<br>series/retrospective<br>N=28              | DLBCL/FL<br>CD19         | 4-1-BB; Lentivirus                                  | ORR, PFS, OS, peak expansion<br>and persistence of CAR-Ts & AEs                                    |
| Cohen AD <sup>33</sup><br>Ph1 (NCT02546167)<br>N=25                            | Multiple myeloma<br>BCMA | 4-1-BB; Lentivirus                                  | ORR, peak expansion and<br>persistence of CAR-Ts, AEs &<br>onset of AEs                            |
| Ying Z <sup>34</sup><br>Ph1 (NCT02842138)<br>N=25                              | B cell lymphoma<br>CD19  | 4-1-BB; Lentivirus                                  | ORR, duration of response, peak<br>expansion and persistence of<br>CAR-Ts, & AEs                   |
| Tu S <sup>35</sup><br>Cohort study<br>(ChiCTR-OOC-<br>16007779)<br>N=25        | ALL<br>CD19              | CD28 & CD27;<br>Lentivirus                          | ORR, DFS, OS & AEs                                                                                 |
| Turtle CJ <sup>36</sup><br>Ph1 (NCT01865617)<br>N=24                           | CLL<br>CD19              | 4-1-BB; Lentivirus                                  | ORR, persistence of CAR-Ts & AEs                                                                   |
| Casadei B <sup>37</sup> Case<br>series/retrospective<br>(Registration details) | LBCL<br>CD19             | CD28 or 4-1-BB<br>gamma-retroviral<br>or lentiviral | ORR, CR, onset of response, PFS,<br>OS, AEs & onset of AEs                                         |

|                                                                               |                           |                                             |                                                                                                                      |
|-------------------------------------------------------------------------------|---------------------------|---------------------------------------------|----------------------------------------------------------------------------------------------------------------------|
| not available)<br>N=24                                                        |                           |                                             |                                                                                                                      |
| Wang J <sup>38</sup><br>Ph1 (ChiCTR-ONN-16009862; & ChiCTR1800019622)<br>N=23 | B-ALL<br>CD19             | 4-1-BB; Lentivirus                          | ORR, onset of response, leukemia-free survival, OS, peak expansion and persistence of CAR-Ts & AEs                   |
| Zhou X <sup>39</sup><br>Ph1 (ChiCTR-OOC-16007779)<br>N=21                     | DLBCL<br>CD19             | CD28; Lentivirus                            | ORR, onset of response, EFS, OS, duration of response, AEs & onset of AEs                                            |
| Hirayama AV <sup>40</sup><br>Ph1/2<br>(NCT01865617)<br>N=21                   | FL<br>CD19                | 4-1-BB; Lentivirus                          | ORR, onset of response, PFS & OS                                                                                     |
| Geyer MB <sup>41</sup><br>Ph1 (NCT00466531)<br>N=20                           | CLL/NHL<br>CD19           | CD28; Retrovirus                            | ORR, EFS, OS, peak expansion and persistence of CAR-Ts, AEs & onset of AEs                                           |
| Rossi J <sup>42</sup><br>Ph1/2<br>(NCT00924326)<br>N=20                       | DLBCL and others<br>CD19  | CD28; Retrovirus                            | ORR, peak expansion of CAR-Ts & AEs                                                                                  |
| Brudno JN <sup>43</sup><br>Ph1 (NCT02659943)<br>N=20                          | DLBCL/FL<br>CD19          | CD28; Retrovirus                            | ORR, EFS, duration of response, peak expansion of CAR-Ts & AEs                                                       |
| Cui R <sup>44</sup><br>Ph1<br>(ChiCTR1800019622 & ChiCTR1800018059)<br>N=20   | DLBCL<br>CD19             | No Data                                     | ORR, PFS, OS, peak expansion and persistence of CAR-Ts, AEs & onset of AEs                                           |
| Roddie C <sup>45</sup><br>Ph1 (NCT02935257)<br>N=20                           | B-ALL<br>CD19             | 4-1-BB; No Data                             | CR, onset of response, EFS, OS, duration of response, peak expansion, persistence of CAR-Ts, AEs & onset of AEs      |
| Gill S <sup>46</sup><br>Ph2 (NCT02640209)<br>N=19                             | CLL<br>CD19               | 4-1-BB (CD137);<br>Lentivirus;<br>Humanized | CR, OS, PFS, ORR, peak expansion, persistence of CAR-Ts, AEs & onset of AEs                                          |
| Wang CM <sup>47</sup><br>Ph1 (NCT02259556)<br>N=18                            | Hodgkins Lymphoma<br>CD30 | 4-1-BB; Lentivirus                          | ORR, PFS, duration of response, peak expansion and persistence of CAR-Ts, AEs & onset of AEs                         |
| Wang D <sup>48</sup><br>Ph1<br>(ChiCTR1800018137)<br>N=18                     | MM<br>BCMA                | 4-1-BB; No Data                             | ORR, CR, onset of response, PFS, OS, duration of response, peak expansion, persistence of CAR-Ts, AEs & onset of AEs |
| Cao J <sup>49</sup><br>Ph1 (NCT02782351)                                      | ALL<br>CD19               | 4-1-BB; Lentivirus                          | CR, LFS, OS, onset of response, duration of response, peak                                                           |

|                                                                 |                           |                                     |                                                                                                                          |
|-----------------------------------------------------------------|---------------------------|-------------------------------------|--------------------------------------------------------------------------------------------------------------------------|
| N=18                                                            |                           |                                     | expansion, AEs & onset of AEs                                                                                            |
| Xu J <sup>50</sup><br>Ph1 (NCT03090659)<br>N=17                 | Multiple myeloma<br>BCMA  | CD28; Lentivirus                    | ORR, PFS, OS, duration of response, peak expansion and persistence of CAR-Ts, AEs & onset of AEs                         |
| Cornell R <sup>51</sup><br>Ph1 (NCT03318861)<br>N=17            | MM and PCL<br>BCMA        | CD28; Lentivirus                    | PFS, OS, peak expansion, AEs & onset of AEs                                                                              |
| Wang X <sup>52</sup><br>Ph1 (NCT01318317 & NCT01815749)<br>N=16 | NHL<br>CD19               | CD28; Lentivirus                    | ORR, PFS, peak expansion and persistence of CAR-Ts, AEs (not clear)                                                      |
| Ramos CA <sup>53</sup><br>Ph1 (NCT00881920)<br>N=16             | ALL/NHL<br>k-light chain  | CD28; Retrovirus                    | ORR, peak expansion & persistence of CAR-Ts                                                                              |
| Davila M <sup>54</sup><br>Ph1 (NCT01044069)<br>N=16             | B-ALL<br>CD19             | 4-1-BB; Retroviral                  | ORR, CR, onset of response, duration of response, AEs & onset of AEs                                                     |
| Sauter CS <sup>55</sup><br>Ph1 (NCT01840566)<br>N=15            | NHL<br>CD19               | CD28; Retrovirus                    | ORR, PFS, peak expansion and persistence of CAR-Ts, AEs & onset of AEs                                                   |
| Hu Y <sup>56</sup><br>Ph1 (ChiCTR-OCC-15007008)<br>N=15         | ALL<br>CD19               | 4-1-BB; Lentivirus                  | ORR, onset of response, RFS, OS, peak expansion and persistence of CAR-Ts, AEs & onset of AEs                            |
| Porter D <sup>57</sup><br>Pilot (NCT01029366)<br>N=14           | CLL<br>CD19               | 4-1-BB; Lentivirus                  | ORR, CR, PR, PFS, OS, duration of response, onset of response, peak expansion, persistence of CAR-Ts, AEs & onset of AEs |
| Frigault MJ <sup>58</sup><br>Ph1(NCT04155749)<br>N=13           | MM<br>BCMA                | 41BB and CD3; Lentivirus; Humanized | CR, PFS, ORR, OS, duration of response, onset of response, peak expansion, persistence of CAR-Ts, AEs & onset of AEs     |
| Baumeister SH <sup>59</sup><br>Ph1 (NCT02203825)<br>N=12        | AML/MDS and MM<br>NKG2D   | NKG2D; Retrovirus                   | ORR, OS, peak expansion and persistence of CAR-Ts, & AEs                                                                 |
| Ali SA <sup>60</sup><br>Ph1 (NCT02215967)<br>N=12               | Multiple myeloma<br>BCMA  | CD28; Retrovirus                    | Peak expansion and persistence of CAR-Ts & AEs                                                                           |
| Enblad G <sup>61</sup><br>Ph1/2 (NCT02132624)<br>N=11           | Leukemia/Lymphoma<br>CD19 | CD28 & 4-1-BB Retrovirus            | ORR, PFS, OS, peak expansion and persistence of CAR-Ts, AEs (not clear)                                                  |
| Yan ZX <sup>62</sup><br>Ph1 (NCT03355859)<br>N=10               | NHL<br>CD19               | 4-1-BB; Lentivirus                  | ORR, peak expansion and persistence of CAR-Ts, AEs & onset of AEs                                                        |
| Magnani CF <sup>63</sup>                                        | B-ALL                     | CD28 & OX40                         | ORR, OS, duration of response,                                                                                           |

|                                                                                |                    |                             |                                                                                                                       |
|--------------------------------------------------------------------------------|--------------------|-----------------------------|-----------------------------------------------------------------------------------------------------------------------|
| Ph1/2<br>(NCT03389035)<br>N=9 (adults only)                                    | CD19               | Sleeping Beauty             | peak expansion of CAR-Ts & AEs                                                                                        |
| Gu R <sup>64</sup><br>Ph1/pilot<br>(NCT02975687)<br>N=9 (adults only)          | B-ALL<br>CD19      | 4-1-BB; Lentivirus<br>Human | ORR, OS, peak expansion and<br>persistence of CAR-Ts, AEs &<br>onset of AEs                                           |
| Geyer MB <sup>65</sup><br>Ph1 (NCT01416974)<br>N=8                             | CLL<br>CD19        | CD28; No Data               | ORR, PFS, OS, AEs & onset of AEs                                                                                      |
| Cruz CR <sup>66</sup><br>Ph1 (NCT00840853)<br>N=8                              | B-ALL<br>CD19      | CD28; Retrovirus            | ORR, persistence of CAR-Ts & AEs                                                                                      |
| Kochenderfer JN <sup>67</sup><br>Ph1/pilot<br>(NCT00924326)<br>N=8             | FL and CLL<br>CD19 | CD28; Retrovirus            | ORR, duration of response, &<br>persistence of CAR-Ts                                                                 |
| Bao F <sup>68</sup><br>Ph1 (Registration<br>details not available)<br>N=5      | DLBCL<br>CD19      | 4-1-BB; Lentivirus          | ORR, peak expansion and<br>persistence of CAR-Ts, & AEs                                                               |
| Eom HS <sup>69</sup><br>Ph1 (Registration<br>details not available)<br>N=4     | Multiple<br>LMP2A  | 4-1-BB; No Data             | ORR, onset of response, duration<br>of response & AEs                                                                 |
| Ritchie DS <sup>70</sup><br>Ph1 (Registration<br>details not available)<br>N=4 | AML<br>LeY         | CD28; Retroviral            | ORR, peak expansion and<br>persistence of CAR-Ts & AEs                                                                |
| Zhang Q <sup>71</sup><br>Pilot (Registration<br>details not available)<br>N=4  | B-ALL<br>CD19      | 4-1-BB; Lentivirus          | ORR, duration of response, peak<br>expansion of CAR-Ts, AEs & onset<br>of AEs                                         |
| Kalos M <sup>72</sup><br>Pilot (Registration<br>details not available)<br>N=3  | CLL<br>CD19        | 4-1-BB; No Data<br>no data  | ORR, onset of response, duration<br>of response, peak expansion and<br>persistence of CAR-Ts                          |
| Weng J <sup>73</sup><br>Pilot (NCT02822326)<br>N=3 (2, adults only)            | B-ALL<br>CD19      | No Data;<br>Lentivirus      | ORR, onset of response, peak<br>expansion and persistence of<br>CAR-Ts & AEs                                          |
| Feng J <sup>74</sup> Ph1<br>(NCT04594135)<br>N=1                               | T-LBL<br>CD5       | No Data;<br>Lentivirus      | Complete eradication, onset of<br>response, OS, duration of<br>response, persistence of CAR-Ts,<br>AEs & onset of AEs |

**Supplementary Table S2.** Quality assessment for the included studies

|                          | Risk of bias                                |                                      |                                       |                                                  |                                    | Indirectness                                                            | Imprecision                                    |                                                            |
|--------------------------|---------------------------------------------|--------------------------------------|---------------------------------------|--------------------------------------------------|------------------------------------|-------------------------------------------------------------------------|------------------------------------------------|------------------------------------------------------------|
|                          | Selection bias                              | Attrition bias                       | Reporting/Detection bias              |                                                  |                                    |                                                                         |                                                |                                                            |
| First Author [reference] | IRC involved in patient selection (Yes; No) | Loss to follow-up (<5%; 5-20%; >20%) | Objective outcomes assessed (Yes; No) | IRC involved in assessment of response (Yes; No) | Safety outcomes reported (Yes; No) | Heterogeneity (Single sub-type; 2 sub-types; >2 sub-types in the study) | Sample size (<30; 30-50; >50 patients treated) | Duration of follow-up (<6 months; 6-12 months; >12 months) |
| Bishop M <sup>1</sup>    | No                                          | >20%                                 | Yes                                   | Yes                                              | Yes                                | 2 sub-types                                                             | > 50                                           | NR                                                         |
| Abramson JS <sup>2</sup> | Yes                                         | >20%                                 | Yes                                   | Yes                                              | Yes                                | Single sub-type                                                         | > 50                                           | 6-12 months                                                |
| Zhang X <sup>3</sup>     | No*                                         | 5-20%                                | Yes                                   | No                                               | Yes                                | Single sub-type                                                         | > 50                                           | NR                                                         |
| Munshi NC <sup>4</sup>   | No*                                         | >20%                                 | Yes                                   | Yes                                              | Yes                                | Single sub-type                                                         | > 50                                           | >12 months                                                 |
| Kittai A <sup>5</sup>    | No                                          | Consort Diagram Not Reported         | Yes                                   | No                                               | Yes                                | Single sub-type                                                         | > 50                                           | >12 months                                                 |
| Neelapu SS <sup>6</sup>  | No                                          | Consort Diagram Not Reported         | Yes                                   | No                                               | Yes                                | >2 sub-types                                                            | > 50                                           | >12 months                                                 |
| Berdeja JG <sup>7</sup>  | No*                                         | 5-20%                                | Yes                                   | Yes                                              | Yes                                | Single sub-type                                                         | > 50                                           | >12 months                                                 |

|                           |     |                              |     |     |     |                 |      |             |
|---------------------------|-----|------------------------------|-----|-----|-----|-----------------|------|-------------|
| Fowler N <sup>8</sup>     | No  | <5%;                         | Yes | No  | Yes | Single sub-type | > 50 | >12 months  |
| Schuster S J <sup>9</sup> | No  | >20%                         | Yes | Yes | Yes | >2 sub-types    | > 50 | <6 months   |
| Itzhaki O <sup>10</sup>   | No  | Consort Diagram Not Reported | Yes | No  | Yes | >2 sub-types    | > 50 | NR          |
| Li M <sup>11</sup>        | No* | >20%                         | Yes | No  | Yes | Single sub-type | >50  | NR          |
| Sesques P <sup>12</sup>   | No* | Consort Diagram Not Reported | Yes | No  | Yes | >2 sub-types    | > 50 | <6 months   |
| Wang M <sup>13</sup>      | No  | Consort Diagram Not Reported | Yes | Yes | Yes | Single sub-type | > 50 | >12 months  |
| Ying Z <sup>14</sup>      | No* | 5-20%                        | Yes | Yes | Yes | Single sub-type | > 50 | 6-12 months |
| Zhao WH <sup>15</sup>     | No* | Consort Diagram Not Reported | Yes | No  | Yes | Single sub-type | > 50 | 6-12 months |
| Shah BD <sup>16</sup>     | No  | >20%                         | Yes | No  | Yes | Single sub-type | > 50 | >12 months  |
| Shah BD <sup>17</sup>     | No  | Consort Diagram Not Reported | Yes | No  | Yes | Single sub-type | > 50 | >12 months  |
| Jiang H <sup>18</sup>     | No* | Consort                      | Yes | No  | Yes | Single sub-type | > 50 | NR          |



|                           |     |                                       |     |     |     |                 |       |                |
|---------------------------|-----|---------------------------------------|-----|-----|-----|-----------------|-------|----------------|
|                           |     | Diagram<br>Not<br>Reported            |     |     |     |                 |       |                |
| Park JH <sup>19</sup>     | No  | >20%                                  | Yes | No  | Yes | Single sub-type | > 50  | >12 months     |
| Summers C <sup>20</sup>   | No* | >20%                                  | Yes | No  | Yes | Single sub-type | 30-50 | >12 months     |
| Ramos CA <sup>21</sup>    | No* | 5-20%                                 | Yes | No  | Yes | Single sub-type | 30-50 | >12 months     |
| Wudhikarn K <sup>22</sup> | No  | >20%                                  | Yes | No  | Yes | Single sub-type | 30-50 | >12 months     |
| Shao M <sup>23</sup>      | No  | Consort<br>Diagram<br>Not<br>Reported | Yes | No  | Yes | Single sub-type | 30-50 | NR             |
| Frey NV <sup>24</sup>     | No* | >20%                                  | Yes | No  | Yes | Single sub-type | 30-50 | >12 months     |
| Pan J <sup>25</sup>       | No* | Consort<br>Diagram<br>Not<br>Reported | Yes | No  | Yes | Single sub-type | 30-50 | NR             |
| Raje N <sup>26</sup>      | No* | >20%                                  | Yes | Yes | Yes | Single sub-type | 30-50 | 6-12<br>months |
| Turtle CJ <sup>27</sup>   | No* | Consort<br>Diagram<br>Not<br>Reported | Yes | No  | Yes | >2 sub-types    | 30-50 | 6-12<br>months |
| Frey NV <sup>28</sup>     | No* | 5-20%                                 | Yes | No  | Yes | Single sub-type | 30-50 | >12 months     |
| An F <sup>29</sup>        | No* | >20%                                  | Yes | No  | Yes | Single sub-type | 30-50 | NR             |
| Li C <sup>30</sup>        | No* | >20%                                  | Yes | No  | Yes | 2 sub-types     | 30-50 | >12 months     |

|                           |     |                              |     |     |     |                 |     |             |
|---------------------------|-----|------------------------------|-----|-----|-----|-----------------|-----|-------------|
|                           |     |                              |     |     |     |                 |     |             |
| Turtle CJ <sup>31</sup>   | No  | Consort Diagram Not Reported | Yes | No  | Yes | >2 sub-types    | <30 | 6-12 months |
| Schuster SJ <sup>32</sup> | No  | Consort Diagram Not Reported | Yes | Yes | Yes | 2 sub-types     | <30 | >12 months  |
| Cohen AD <sup>33</sup>    | No  | 5-20%                        | Yes | Yes | Yes | Single sub-type | <30 | >12 months  |
| Ying Z <sup>34</sup>      | No* | Consort Diagram Not Reported | Yes | No  | Yes | >2 sub-types    | <30 | NR          |
| Tu S <sup>35</sup>        | No  | Consort Diagram Not Reported | Yes | No  | Yes | Single sub-type | <30 | 6-12 months |
| Turtle CJ <sup>36</sup>   | No  | Consort Diagram Not Reported | Yes | No  | Yes | Single sub-type | <30 | 6-12 months |
| Casadei B <sup>37</sup>   | No* | Consort Diagram Not Reported | Yes | No  | Yes | >2 sub-types    | <30 | 6-12 months |
| Wang J <sup>38</sup>      | No* | Consort Diagram Not Reported | Yes | No  | Yes | Single sub-type | <30 | >12 months  |
| Zhou X <sup>39</sup>      | No* | Consort Diagram Not Reported | Yes | No  | Yes | >2 sub-types    | <30 | >12 months  |

|                           |     |                              |     |    |     |                 |     |             |
|---------------------------|-----|------------------------------|-----|----|-----|-----------------|-----|-------------|
| Hirayama AV <sup>40</sup> | No  | Consort Diagram Not Reported | Yes | No | Yes | Single sub-type | <30 | >12 months  |
| Geyer MB <sup>41</sup>    | No  | >20%                         | Yes | No | Yes | >2 sub-type     | <30 | >12 months  |
| Rossi J <sup>42</sup>     | No  | Consort Diagram Not Reported | Yes | No | Yes | >2 sub-types    | <30 | NR          |
| Brudno JN <sup>43</sup>   | No  | <5%                          | Yes | No | Yes | >2 sub-types    | <30 | NR          |
| Cui R <sup>44</sup>       | No* | Consort Diagram Not Reported | Yes | No | Yes | Single sub-type | <30 | 6-12 months |
| Roddie C <sup>45</sup>    | No* | Consort Diagram Not Reported | Yes | No | Yes | Single sub-type | <30 | >12 months  |
| Gill S <sup>46</sup>      | No  | 5-20%                        | Yes | No | Yes | Single sub-type | <30 | >12 months  |
| Wang CM <sup>47</sup>     | No  | Consort Diagram Not Reported | Yes | No | Yes | >2 sub-types    | <30 | NR          |
| Wang D <sup>48</sup>      | No  | >20%                         | Yes | No | Yes | Single sub-type | <30 | >12 months  |
| Cao J <sup>49</sup>       | No* | Consort Diagram Not Reported | Yes | No | Yes | Single sub-type | <30 | 6-12 months |
| Xu J <sup>50</sup>        | No* | Consort                      | Yes | No | Yes | Single sub-type | <30 | >12 months  |

|                             |     |                              |     |    |     |                 |     |             |
|-----------------------------|-----|------------------------------|-----|----|-----|-----------------|-----|-------------|
|                             |     | Diagram Not Reported         |     |    |     |                 |     |             |
| Cornell R <sup>51</sup>     | No  | Consort Diagram Not Reported | Yes | No | Yes | Single sub-type | <30 | 6-12 months |
| Wang X <sup>52</sup>        | No  | Consort Diagram Not Reported | Yes | No | Yes | 2 sub-types     | <30 | >12 months  |
| Ramos CA <sup>53</sup>      | No* | <5%                          | Yes | No | Yes | >2 sub-types    | <30 | NR          |
| Davila M <sup>54</sup>      | No  | <5%                          | Yes | No | Yes | Single sub-type | <30 | >12 months  |
| Sauter CS <sup>55</sup>     | No  | Consort Diagram Not Reported | Yes | No | Yes | >2 sub-types    | <30 | >12 months  |
| Hu Y <sup>56</sup>          | No  | 5-20%                        | Yes | No | Yes | Single sub-type | <30 | <6 months   |
| Porter D <sup>57</sup>      | No* | >20%                         | Yes | No | Yes | Single sub-type | <30 | >12 months  |
| Frigault MJ <sup>58</sup>   | No  | <5%                          | Yes | No | Yes | Single sub-type | <30 | >12 months  |
| Baumeister SH <sup>59</sup> | No* | Consort Diagram Not Reported | Yes | No | Yes | 2 sub-types     | <30 | 6-12 months |
| Ali SA <sup>60</sup>        | No  | Consort Diagram Not          | Yes | No | Yes | Single sub-type | <30 | <6 months   |

|                               |     |                              |     |    |     |                 |     |             |
|-------------------------------|-----|------------------------------|-----|----|-----|-----------------|-----|-------------|
|                               |     | Reported                     |     |    |     |                 |     |             |
| Enblad G <sup>61</sup>        | No  | Consort Diagram Not Reported | Yes | No | Yes | >2 sub-types    | <30 | NR          |
| Yan ZX <sup>62</sup>          | No  | Consort Diagram Not Reported | Yes | No | Yes | >2 sub-types    | <30 | 6-12 months |
| Magnani CF <sup>63</sup>      | No  | <5%                          | Yes | No | Yes | Single sub-type | <30 | 6-12 months |
| Gu R <sup>64</sup>            | No* | Consort Diagram Not Reported | Yes | No | Yes | Single sub-type | <30 | 6-12 months |
| Geyer MB <sup>65</sup>        | No  | Consort Diagram Not Reported | Yes | No | Yes | Single sub-type | <30 | >12 months  |
| Cruz CR <sup>66</sup>         | No  | Consort Diagram Not Reported | Yes | No | Yes | 2 sub-types     | <30 | NR          |
| Kochenderfer JN <sup>67</sup> | No  | Consort Diagram Not Reported | Yes | No | Yes | >2 sub-types    | <30 | 6-12 months |
| Bao F <sup>68</sup>           | No  | Consort Diagram Not Reported | Yes | No | Yes | Single sub-type | <30 | <6 months   |
| Eom HS <sup>69</sup>          | No* | Consort Diagram              | Yes | No | Yes | >2 sub-types    | <30 | NR          |

|                          |     |                              |     |    |     |                 |     |             |
|--------------------------|-----|------------------------------|-----|----|-----|-----------------|-----|-------------|
|                          |     | Not Reported                 |     |    |     |                 |     |             |
| Ritchie DS <sup>70</sup> | No* | Consort Diagram Not Reported | Yes | No | Yes | Single sub-type | <30 | NR          |
| Zhang Q <sup>71</sup>    | No* | Consort Diagram Not Reported | Yes | No | No  | Single sub-type | <30 | NR          |
| Kalos M <sup>72</sup>    | No* | Consort Diagram Not Reported | Yes | No | Yes | Single sub-type | <30 | NR          |
| Weng J <sup>73</sup>     | No* | Consort Diagram Not Reported | Yes | No | Yes | Single sub-type | <30 | 6-12 months |
| Feng J <sup>74</sup>     | No  | <5%                          | Yes | No | Yes | Single sub-type | <30 | >12 months  |

\* Independent review committee/board approved the study's protocol and had patients sign consent forms

IRC, independent review committee

All observational and single arm unblinded studies are given low grade and the grade is moved upwards based on quality assessment.<sup>75-78</sup>

Risk of Bias mainly involves selection bias and reporting or detection bias. Selection bias is low, and quality is high for studies that included an IRC for patient selection and that had <5% loss of patients to follow-up. Studies with 5-20% loss to follow-up are considered to have medium selection bias and studies with over 20% loss to follow-up are considered to have high selection bias.

Reporting or detection bias is considered low for studies that evaluated objective outcomes, included an IRC for response assessment, and reported treatment-related adverse events (safety). Studies that reported subjective outcomes (e. g. patient reported outcomes) or studies that did not include IRC for response assessment or studies that did not report safety outcomes are rated as high for reporting or detection bias.

Indirectness (comparability) of the cohort between studies is considered low and quality is also high for studies that have a homogenous cohort (single type of cancer). Studies with up to 2 cancer-subtypes are rated as medium for indirectness and with >2 cancer-subtypes are rated as low for comparability.

Imprecision of the cohort is considered high and quality is low for studies that have low sample size (<30 patients) and small follow-up (<6 months). Studies that have a sample size of 30-50 patients or with 6-12 months follow-up are rated medium for imprecision. Studies with sample size of >50 patients and with follow-up over 12 months are rated low for imprecision and high for quality.

**Table S3.** Summary of response and adverse events in studies

| First Author [#]<br>Indication             | Dose <sup>a</sup><br>(million cells)                                                | Response                                                                                                     | Adverse events <sup>b</sup>                                                                                                                             | Findings on association<br>with dose                                                                                     |
|--------------------------------------------|-------------------------------------------------------------------------------------|--------------------------------------------------------------------------------------------------------------|---------------------------------------------------------------------------------------------------------------------------------------------------------|--------------------------------------------------------------------------------------------------------------------------|
| Bishop M <sup>1</sup><br>LBCL              | Range: 40-590<br>(Response correlation assessed per 100 million increments in dose) | Overall: ORR, 46%; CRR, 28% (week-12)                                                                        | All grade CRS: 61%<br>Grade ≥3 CRS: 5%<br>All grade neurotoxicity: 10%<br>Grade ≥3 neurotoxicity: 2%                                                    | Study noted dose-response correlation in patients with PD or SD prior to infusion                                        |
| Abramson JS <sup>2</sup><br>DLBCL          | DL1: 50; DL2: 100; DL3: 150                                                         | Overall: ORR, 73%; CRR, 53%<br>DL1: ORR, 68%; CRR, 60%<br>DL2: ORR, 74%; CRR, 52%<br>DL3: ORR, 73%, CRR, 51% | All grade CRS: 42%<br>Grade ≥3 CRS: 2%<br>All grade neurotoxicity: 30%<br>Grade ≥3 neurotoxicity: 10%                                                   | No correlation between dose and response. Peak expansion correlated with CRS and Neurotoxicity incidence & severity      |
| Zhang X <sup>3</sup><br>B-ALL              | Range: 1.4-371<br>DL1: <21<br>DL2: ≥21                                              | CRR: 90.9%                                                                                                   | All grade CRS: 68.1%<br>Grade ≥3 CRS: 10.2%<br>All grade neurotoxicity: 2/254 (cerebral hemorrhage and severe neurotoxicity)<br>Grade ≥3 neurotoxicity: | CAR-T cell dose did not correlate with LFS and OS or CR rates. CAR-T cell dose also did not correlate with neurotoxicity |
| Munshi NC <sup>4</sup><br>Multiple myeloma | DL1: 150; DL2: 300; DL3: 450                                                        | Overall: ORR, 73%; CRR, 33%<br>DL1: ORR, 50%; CRR, 25%<br>DL2: ORR, 69%; CRR, 29%<br>DL3: ORR, 81%, CRR, 39% | All grade CRS: 84%<br>Grade ≥3 CRS: 5%<br>All grade neurotoxicity: 18%<br>Grade ≥3 neurotoxicity: 3%                                                    | Clear dose response correlation was observed. Incidence of CRS also increased with dose.                                 |



|                                             |                            |                                                                |                                                                                                        |                                                                                                                                                                                                                  |
|---------------------------------------------|----------------------------|----------------------------------------------------------------|--------------------------------------------------------------------------------------------------------|------------------------------------------------------------------------------------------------------------------------------------------------------------------------------------------------------------------|
| Kittai A <sup>5</sup><br>DLBCL              | No data                    | ORR: 88%, CR: 42.3%                                            | All grade CRS: 78.5%<br>Grade ≥3 CRS: NR<br>All grade neurotoxicity: NR<br>Grade ≥3 neurotoxicity: NR  | Study did not report correlation or lack of correlation between dose and response                                                                                                                                |
| Neelapu SS <sup>6</sup><br>DLBCL            | 140                        | At 6 months: ORR, 82%; CRR, 52%<br>At 1-yr: ORR, 82%; CRR, 58% | All grade CRS: 93%<br>Grade ≥3 CRS: 13%<br>All grade neurotoxicity: 64%<br>Grade ≥3 neurotoxicity: 28% | Response and adverse events significantly correlated with CAR-T cell expansion. AUC was 5.4 times high in responders                                                                                             |
| Berdeja JG <sup>7</sup><br>Multiple myeloma | 52.5                       | ORR, 97%; sCRR, 67%                                            | All grade CRS: 95%<br>Grade ≥3 CRS: 4%<br>All grade neurotoxicity: 21%<br>Grade ≥3 neurotoxicity: 9%   | Overall responder rate was high so correlation analysis was not performed                                                                                                                                        |
| Fowler N <sup>8</sup><br>FL                 | Range: 60-600 <sup>c</sup> | ORR, 86%; CRR, 69%                                             | All grade CRS: 49%<br>Grade ≥3 CRS: none<br>All grade neurotoxicity: 37%<br>Grade ≥3 neurotoxicity: 3% | No impact of dose on overall response was noted but the incidence of CRS was higher in patients who received ≥100 million cells. Cmax, time to reach Cmax and AUC were similar for responders and non-responders |
| Schuster SJ <sup>9</sup><br>DLBCL           | 300                        | At 6 months: ORR, 33%; CRR, 29%                                | All grade CRS: 58%<br>Grade ≥3 CRS: 22%<br>All grade neurotoxicity: 21%<br>Grade ≥3 neurotoxicity: 12% | No apparent effect of dose/exposure on clinical outcome                                                                                                                                                          |
| Itzhaki O <sup>10</sup><br>ALL and NHL      | 70                         | ALL: ORR & CRR, 84%                                            | Not reported                                                                                           | Mainly concluded that cells from ALL patients                                                                                                                                                                    |

|                                           |                                |                                                                          |                                                                                                        |                                                                                                                                                                                           |
|-------------------------------------------|--------------------------------|--------------------------------------------------------------------------|--------------------------------------------------------------------------------------------------------|-------------------------------------------------------------------------------------------------------------------------------------------------------------------------------------------|
|                                           |                                | NHL: ORR, 62%; CRR, 31%                                                  |                                                                                                        | had high proliferation rate and CAR-T cell incidence compared to NHL                                                                                                                      |
| Li M <sup>11</sup><br>B-ALL               | 35                             | CRR: 83%                                                                 | All grade CRS: 73%<br>Grade ≥3 CRS: 29%<br>All grade neurotoxicity: NR<br>Grade ≥3 neurotoxicity: 9%   | Mainly concluded that B-ALL patients with low tumor burden had better efficacy and lower toxicity                                                                                         |
| Sesques P <sup>12</sup><br>DLBCL          | 140 or 350                     | All patients:<br>Month 1 ORR, 63%; CRR, 48%<br>Month 3 ORR 45%; CRR, 39% | All grade CRS: 85%<br>Grade ≥3 CRS: 8%<br>All grade neurotoxicity: 28%<br>Grade ≥3 neurotoxicity: 10%  | Number of treatment lines prior to CAR-T therapy and basal LDH levels were adverse prognostic factors for response in multivariate analysis                                               |
| Wang M <sup>13</sup><br>MCL               | 140                            | At 7 months:<br>ORR, 93%;<br>CRR, 67%                                    | All grade CRS: 91%<br>Grade ≥3 CRS: 15%<br>All grade neurotoxicity: 63%<br>Grade ≥3 neurotoxicity: 31% | Expansion was significantly associated with response. AUC and peak level were comparatively more than 200 times high in responders.                                                       |
| Ying Z <sup>14</sup><br>B-cell lymphoma   | 100 or 150                     | All patients:<br>BOR, 76%;<br>CRR, 52%                                   | All grade CRS: 48%<br>Grade ≥3 CRS: 5%<br>All grade neurotoxicity: 20%<br>Grade ≥3 neurotoxicity: 5%   | No difference in response between dose groups. Patients who failed ≥3 lines had slightly lower response. Grade ≥3 CRS and neurotoxicity occurred in DL2. AEs correlated with peak and AUC |
| Zhao WH <sup>15</sup><br>Multiple myeloma | Range: 4.9 to 147 <sup>c</sup> | ORR, 88%;<br>CRR, 68%                                                    | All grade CRS: 90%<br>Grade ≥3 CRS: 7%<br>All grade neurotoxicity: 2%<br>Grade ≥3 neurotoxicity:       | Overall incidence and severity of CRS was higher in above median CART-dose. No clear relationship between dose and disease response                                                       |

|                                |                                |                                                 |                                                                                                                                                                                                       |                                                                                                                                                                                                                                                      |
|--------------------------------|--------------------------------|-------------------------------------------------|-------------------------------------------------------------------------------------------------------------------------------------------------------------------------------------------------------|------------------------------------------------------------------------------------------------------------------------------------------------------------------------------------------------------------------------------------------------------|
|                                |                                |                                                 | none                                                                                                                                                                                                  |                                                                                                                                                                                                                                                      |
| Shah BD <sup>16</sup><br>B-ALL | 70                             | CRR: 71% at 4 months                            | All grade CRS: 89%<br>Grade $\geq 3$ CRS: 24%<br>All grade neurotoxicity: 60%<br>Grade $\geq 3$ neurotoxicity: 24%                                                                                    | Single dose used and study did not investigate dose correlation with response.                                                                                                                                                                       |
| Shah BD <sup>17</sup><br>ALL   | DL: 35; DL2: 70; DL3: 140      | DL1: CRR, 50%<br>DL2: CRR, 83%<br>DL3: CRR, 67% | DL1, 2 and 3 respectively<br>All grade CRS: 81%, 100% and 100%<br>Grade $\geq 3$ CRS: 25%, 30% and 50%<br>All grade neurotoxicity: 63%, 83% and 83%<br>Grade $\geq 3$ neurotoxicity: 25%, 42% and 50% | Response was highest in DL2 and correlated with CAR peak. DL3 did not have best response but had highest toxicity incidence. DL3 cohort was required to enroll patients with high tumor burden (>25% blasts). CRS severity correlated with CAR peak. |
| Jiang H <sup>18</sup><br>B-ALL | Range: 62.3-280.7 <sup>d</sup> | All patients: CRR, 81% (no partial responders)  | All grade CRS: 100%<br>Grade $\geq 3$ CRS: 36%<br>Grade 2 & 3 neurotoxicity: 15%                                                                                                                      | Study did not report correlation or lack of correlation between dose and response. Objective was to evaluate coagulation disorders, biomarkers of coagulation disorders and management of coagulation disorders                                      |
| Park JH <sup>19</sup><br>B-ALL | DL1: 70; DL2: 210              | All patients: CRR, 83%                          | All grade CRS: 85%<br>Grade $\geq 3$ CRS: 26%<br>All grade neurotoxicity: 44%<br>Grade $\geq 3$                                                                                                       | Both response and AEs correlated with peak CAR-T expansion. Rate of CR was not significantly different between two dose groups                                                                                                                       |

|                                               |                                                                 |                                                                                                              |                                                                                                          |                                                                                                                                                                                    |
|-----------------------------------------------|-----------------------------------------------------------------|--------------------------------------------------------------------------------------------------------------|----------------------------------------------------------------------------------------------------------|------------------------------------------------------------------------------------------------------------------------------------------------------------------------------------|
|                                               |                                                                 |                                                                                                              | neurotoxicity:<br>42%                                                                                    |                                                                                                                                                                                    |
| Summers C <sup>20</sup> ; B-ALL; N=50         | DL1: 35;<br>DL2: 70;<br>DL3: 350;<br>DL4: 700                   | CR: 28.6% (12 months median)                                                                                 | All grade CRS: 76%<br>Grade ≥3 CRS: 24%<br>All grade neurotoxicity: NR<br>Grade ≥3 neurotoxicity: NR     | Study did not report correlation or lack of correlation between dose and response. Study was designed to evaluate the efficacy of HSCT post CAR-T cell therapy                     |
| Ramos CA <sup>21</sup> ; HL; N=41             | DL1: 32;<br>DL2: 160;<br>DL3: 320                               | All patients: ORR, 62%; CR, 51%                                                                              | All grade CRS: 24% (only grade 1 seen)<br>No neurotoxicity                                               | Clinical response did not correlate with dose, but peak expansion correlated with dose                                                                                             |
| Wudhikarn K <sup>22</sup> ; B-ALL; N=38       | Range: 28-210 <sup>c</sup>                                      | CR: 43%                                                                                                      | All grade CRS: 84.2%<br>Grade ≥3 CRS: 23.7%<br>All grade neurotoxicity: NR<br>Grade ≥3 neurotoxicity: NR | Study did not report correlation or lack of correlation between dose and response. Study was designed to evaluate the outcomes in patients who had relapse post CAR-T cell therapy |
| Shao M <sup>23</sup> ; Multiple myeloma; N=37 | 245                                                             | ORR, 97%; CR, 59%                                                                                            | All grade CRS: 100%<br>Grade ≥3 CRS: 54%<br>All grade neurotoxicity: 3%<br>Grade ≥3 neurotoxicity: 3%    | Study did not report correlation or lack of correlation between dose and response. Objective was to understand biomarkers of CRS and association with coagulation disorders        |
| Frey NV <sup>24</sup> ; ALL; N=35             | 50 or 500                                                       | CR, 69% in all pts; 33% in low dose, 50% in High dose single infusion and 90% in high dose fractionated dose | All grade CRS: 94%<br>Grade ≥3 CRS: 72%<br>All grade neurotoxicity: 42%<br>Grade ≥3 neurotoxicity: 6%    | Response increased with dose, but incidence and severity of CRS also increased with dose. Dose fractionation mitigated the CRS severity without compromising efficacy              |
| Pan J <sup>25</sup> ; B-ALL; N=34             | 52.5 in non-transplanted patients or 7 in transplanted patients | In all patients: CR, 71%                                                                                     | All grade CRS: 91%<br>Grade ≥3 CRS: 3%<br>Neurotoxicity: 18% (all cases ≤grade 2)                        | No difference in response between transplanted and non-transplanted patients. Response was higher in patients with higher                                                          |

|                                               |                                         |                                                                                                               |                                                                                                      | peak                                                                                                                                                                                               |
|-----------------------------------------------|-----------------------------------------|---------------------------------------------------------------------------------------------------------------|------------------------------------------------------------------------------------------------------|----------------------------------------------------------------------------------------------------------------------------------------------------------------------------------------------------|
| Raje N <sup>26</sup> ; Multiple myeloma; N=33 | DL1: 150;<br>DL2: 450;<br>DL3: 800      | DL1: ORR, 33%; CRR, 0%<br>DL2: ORR, 75%; CRR, 63%<br>DL3: ORR, 95%; CRR, 42%                                  | All grade CRS: 76%<br>Grade ≥3 CRS: 6%<br>All grade neurotoxicity: 42%<br>Grade ≥3 neurotoxicity: 3% | Clear dose response was noted. However, CRS incidence also increased with dose                                                                                                                     |
| Turtle CJ <sup>27</sup> ; NHL; N=32           | DL1: 14;<br>DL2: 140;<br>DL3: 1400      | All patients: ORR, 63%; CR, 33%<br>DL1: ORR, 60%; CR, 20%<br>DL2: ORR, 67%; CR, 44%<br>DL3: ORR, 57%; CR, 14% | All grade CRS: 63%<br>Grade ≥3 CRS: 13%<br>All grade neurotoxicity: 28% (all Grade ≥3)               | No apparent effect of dose on ORR but severe CRS incidence increased with dose. However, higher peak expansion and longer duration of CAR-T cell persistence were associated with tumor regression |
| Frey NV <sup>28</sup> ; CLL; N=32             | 50 or 500                               | DL1: CR, 15%<br>DL2: ORR, 53%; CR, 37%                                                                        | All grade CRS: 63%<br>Grade ≥3 CRS: 39%<br>Grade ≥3 neurotoxicity: 8%                                | Study noted correlation between dose and ORR. Severity of CRS and neurotoxicity also correlated with dose                                                                                          |
| An F <sup>29</sup> ; B-ALL; N=30 (adults)     | Range: 70-350 <sup>c</sup>              | All patients: overall remission, 81%                                                                          | CRS: All grade, 83%; Grade ≥3, 23%<br>Neurotoxicity: All grade, 4.2%; Grade ≥3, 2.1%                 | No significant difference between children and adults regarding response and survival. Details of dose-response correlation not provided                                                           |
| Li C <sup>30</sup> ; MM and PCL; N=30         | Range: 378 – 1750<br>DL1≤784<br>DL2>784 | ORR: 90%, CR: 43%                                                                                             | CRS: All grade, 97%; Grade ≥3, 17%<br>Neurotoxicity: All grade, 3.3%; Grade ≥3, 0%                   | CAR-T doses showed no significant effect on the best response, PFS, OS and incidence and severity of CRS                                                                                           |
| Turtle CJ <sup>31</sup> ; B-ALL; N=29         | DL1: 14; DL2: 140; DL3: 1400            | Overall: ORR, 100%; CR, 93%                                                                                   | CRS: All grade 83%; Grade ≥3, 23%<br>Neurotoxicity: All grade, 50%; Grade ≥3, 50%                    | Response noted at all dose levels. Adverse events were higher in DL3                                                                                                                               |
| Schuster SJ <sup>32</sup> ; DLBCL/FL; N=28    | Range: 216-621 <sup>c</sup>             | At 6 months: CR, 52%                                                                                          | CRS: All grade, 57%; Grade ≥3,                                                                       | Study did not report dose-response or dose-                                                                                                                                                        |

|                                                 |                                                                  |                                                                                                         |                                                                                                     |                                                                                                                                                                                                                                              |
|-------------------------------------------------|------------------------------------------------------------------|---------------------------------------------------------------------------------------------------------|-----------------------------------------------------------------------------------------------------|----------------------------------------------------------------------------------------------------------------------------------------------------------------------------------------------------------------------------------------------|
|                                                 |                                                                  |                                                                                                         | 18%<br>Neurotoxicity: All grade, 39%;<br>Grade $\geq 3$ , 11%                                       | safety correlation                                                                                                                                                                                                                           |
| Cohen AD <sup>33</sup> ; Multiple myeloma; N=25 | DL2, 10-50<br>DL3, 100-500<br>(DL1 had no lymphodepletion)       | ORR: Overall, 48%; DL1, 44%; DL2, 20%; DL3, 64%                                                         | CRS: All grade, 88%; Grade $\geq 3$ , 32%<br>Neurotoxicity: All grade, 32%;<br>Grade $\geq 3$ , 12% | Dose response was seen between DL2 and DL3. Incidence and severity of CRS and ICANS was higher in DL3 compared to DL2                                                                                                                        |
| Ying Z <sup>34</sup> ; B cell lymphoma; N=25    | DL1, 3-6<br>DL2 60-190<br>DL3, 200-400                           | Overall: ORR, 33%; CR, 29%<br>DL1: ORR, 50%, CR, 17%<br>DL2, ORR, 50%, CR, 0%<br>DL3, ORR, 73%, CR, 55% | CRS: All grade 28%; Grade $\geq 3$ , 0%<br>No neurotoxicity                                         | Maximum response was noted at highest dose but DL2 was not better than DL1                                                                                                                                                                   |
| Tu S <sup>35</sup> ; ALL; N=25                  | Range: 6.2-280<br>DL1: $\leq 35$<br>DL2: $>35$                   | Overall: ORR 92%; CR, 88%                                                                               | CRS: All grade, 48%; Grade $\geq 3$ , 0%<br>No neurotoxicity                                        | Response rate was very high. No correlation between dose and response. CRS incidence was high at higher doses                                                                                                                                |
| Turtle CJ <sup>36</sup> ; CLL; N=24             | DL1: 14; DL2: 140; DL3: 1400                                     | All patients: ORR, 70%; CR, 21%<br>DL1: ORR, 100%; CR, 20%; DL2: ORR, 59%; CR, 24%; DL3: PR in 1/1      | CRS: All grade 83%; Grade $\geq 3$ , 8%<br>Neurotoxicity: All grade, 33%;<br>Grade $\geq 3$ , 25%   | Response did not correlate with dose. Peak CAR <sup>+</sup> cells were higher in patients who cleared marrow by flow cytometry. CRS was high in patients with high tumor burden. CRS incidence and severity was higher at higher dose levels |
| Casadei B <sup>37</sup> ; LBCL; N=24            | No data but it can be assumed that label doses were administered | BORR: 77%<br>CRR: 50%                                                                                   | CRS: All grade, 87%; Grade $\geq 3$ , 10%<br>Neurotoxicity: All grade, 43%;<br>Grade $\geq 3$ , 17% | Study was not designed to analyze dose-response correlation                                                                                                                                                                                  |
| Wang J <sup>38</sup> ; B-ALL; N=23              | 70                                                               | ORR, 83%; CR, 52%                                                                                       | CRS: All grade, 100%; Grade $\geq 3$ , 22%                                                          | Study used single dose but noted that TB correlated with CRS                                                                                                                                                                                 |

|                                                |                                                                                                       |                                                                                                    |                                                                                                   |                                                                                                                                                  |
|------------------------------------------------|-------------------------------------------------------------------------------------------------------|----------------------------------------------------------------------------------------------------|---------------------------------------------------------------------------------------------------|--------------------------------------------------------------------------------------------------------------------------------------------------|
|                                                |                                                                                                       |                                                                                                    | Neurotoxicity: All grade, 13%; Grade $\geq 3$ , 4%                                                | levels. Among the 4 non-responders, 2 had high TB                                                                                                |
| Zhou X <sup>39</sup> ; DLBCL; N=21             | 62.3                                                                                                  | All patients: ORR, 67%; CR, 43%<br>Granular dose response data was not shown                       | CRS: All grade, 14%; Grade $\geq 3$ , 0%<br>Neurotoxicity: All grade, 5%; Grade $\geq 3$ , 5%     | Study noted that there was no correlation between dose and response, and between peak expansion and response                                     |
| Hirayama AV <sup>40</sup> ; FL; N=21           | 140                                                                                                   | ORR, 51%; CR, 40%                                                                                  | NR                                                                                                | Study noted that PFS correlated with expansion after lymphodepletion and lower LDH favored better PFS                                            |
| Geyer MB <sup>41</sup> ; CLL/NHL; N=20         | <210 vs 210                                                                                           | Overall CR, 20%                                                                                    | CRS: All grade, 100%; Grade $\geq 3$ , 10%<br>Neurotoxicity: All grade, 45%; Grade $\geq 3$ , 10% | No correlation between dose and response                                                                                                         |
| Rossi J <sup>42</sup> ; DLBCL and others; N=20 | No data                                                                                               | All patients: ORR, 70%; CR, 50%                                                                    | CRS: All grade, NR; Grade $\geq 3$ , 65%<br>Neurotoxicity: All grade, NR; Grade $\geq 3$ , 60%    | Study did not report granular dose response correlation. However, it noted that response and neurotoxicity but not CRS correlated with expansion |
| Brudno JN <sup>43</sup> ; DLBCL/FL; N=20       | DL1: 46.2<br>DL2: 140<br>DL3: 420                                                                     | All patients: ORR, 70%; CR, 55%; DL1: ORR, 83%; CR, 67%; DL2: ORR/CR, 50%; DL3: ORR, 75%; CR, 50%  | CRS: All grade, 80%; Grade $\geq 3$ , 10%<br>Neurotoxicity: All grade, 100%; Grade $\geq 3$ , 5%  | No correlation between dose and response or AE severity                                                                                          |
| Cui R <sup>44</sup> ; DLBCL; N=20              | 70-490<br>DL1 <sup>d</sup> : <140<br>DL2 <sup>d</sup> : 140-<br><280<br>DL3 <sup>d</sup> : $\geq 280$ | All patients: ORR, 85%; CR, 55%; DL1: ORR/CR, 80%; DL2: ORR: 100%; CR, 57%; DL3: ORR, 75%; CR, 38% | CRS: All grade, 100%; Grade $\geq 3$ , 10%<br>Neurotoxicity: All grade, 20%; Grade $\geq 3$ , 0%  | No correlation between dose and response. Grade 3 CRS and neurotoxicity occurred only in DL3 group                                               |

|                                              |                                        |                                    |                                                                                      |                                                                                                                                   |
|----------------------------------------------|----------------------------------------|------------------------------------|--------------------------------------------------------------------------------------|-----------------------------------------------------------------------------------------------------------------------------------|
| Roddie C <sup>45</sup> ; B-ALL; N=20         | 410                                    | CR: 85% at 1 month                 | CRS: All grade, 55%; Grade ≥3, 0%<br>Neurotoxicity: All grade, 20%; Grade 3, 15%     | Peak expansion was not correlated with total CAR-T dose but was strongly associated with both disease burden and with grade 2 CRS |
| Gill S <sup>46</sup> ; CLL; N=19             | Range: 200-500 <sup>c</sup>            | At 12 months, CR: 50%; PR: 36%     | CRS: All grade, 95%; Grade ≥3, 16%<br>Neurotoxicity: All grade, 26%; Grade 3, 5%     | Study was not designed to test dose correlation                                                                                   |
| Wang CM <sup>47</sup> ; HL; N=18             | Range: 770-1470 <sup>e</sup>           | All patients: ORR, 39%; CR, 0%     | CRS: All grade, 100%; Grade ≥3, 0%<br>Neurotoxicity: All grade, 11.2%; Grade ≥3, 0%  | Overall response was very low and did not correlate with dose                                                                     |
| Wang D <sup>48</sup> ; MM; N=18              | DL1: 70; DL2: 210; DL3: 420            | ORR: 100%<br>CR: 72%               | CRS: All grade, 71%; Grade ≥3, 22%<br>Neurotoxicity: No Data                         | No dose-response/ PFS/OS correlation. Incidence of grade 3 or higher CRS was significantly higher in higher dose groups           |
| Cao J <sup>49</sup> ; ALL; N=18              | 70                                     | All patients: CR: 82% at 1 month   | CRS: All grade, 94%; Grade ≥3, 22%<br>Neurotoxicity: All grade, 6%; Grade ≥3, 0%     | Single dose was used in the study and the study did not analyze correlation between dose and response                             |
| Xu J <sup>50</sup> ; Multiple myeloma ; N=17 | 49                                     | All patients: ORR, 88%; CR, 76%    | CRS: All grade, 100%; Grade ≥3, 41%<br>No neurotoxicity                              | Study did not aim to evaluate dose response                                                                                       |
| Cornell R <sup>51</sup> ; MM and PCL; N=17   | DL1: 30; DL2: 100; DL3: 300; DL4: 1000 | Best response: PR, 1 pt; SD, 3 pts | CRS: All grade, 21.4%; Grade ≥3, 0%<br>Neurotoxicity: All grade, 21.4%; Grade ≥3, 0% | No correlation between dose and response. Only response noted was at DL1 (PR in 1 pt) CRS seen only at DL3 and DL4                |
| Wang X <sup>52</sup> ; NHL; N=16             | DL1: 25; DL2: 50; DL3: 100; DL4: 200   | In all patients: ORR, 94%; CR, 81% | NR                                                                                   | No correlation between dose and response. Overall response was very high and even low                                             |



|                                                                  |                                                      |                                                       |                                                                                |                                                                                                                                                                                                      |
|------------------------------------------------------------------|------------------------------------------------------|-------------------------------------------------------|--------------------------------------------------------------------------------|------------------------------------------------------------------------------------------------------------------------------------------------------------------------------------------------------|
|                                                                  |                                                      |                                                       |                                                                                | dose had response. Grade 4 severe CRS seen at 100 mil DL (DLT)                                                                                                                                       |
| Ramos CA <sup>53</sup> ; ALL/NHL; N=16                           | Range: 32-320 <sup>e</sup>                           | In all patients: ORR, 19%; CR, 13%                    | Reports there was no clinical evidence of CRS. Details of neurotoxicity: NR    | Overall response was very low and did not correlate with dose. CR was seen at lowest and highest dose                                                                                                |
| Davila M <sup>54</sup> ; B-ALL; N=16                             | 210                                                  | ORR: 88%, CR: 63%                                     | sCRS: 44%; nCRS: 56% Neurotoxicity: 25%                                        | Response and CRS severity correlated directly with tumor burden                                                                                                                                      |
| Sauter CS <sup>55</sup> ; NHL; N=15                              | DL1: 350<br>DL2: 700                                 | All patients: ORR/CR, 53%                             | CRS: All grade, 40%; Grade ≥3, 20% Neurotoxicity: 67% (all Grade ≥3)           | Only 1 patient treated at DL2 and developed Grade 4 CRS. Study then enrolled all patients at DL1                                                                                                     |
| Hu Y <sup>56</sup> ; ALL; N=15                                   | Range: 77-686 <sup>e</sup>                           | All patients: ORR/CR, 80%                             | CRS: All grade, 67%; Grade ≥3, 27% Neurotoxicity: All grade, 33%               | Overall response was high, and CR was seen at all doses. Dose response was not seen. Authors also noted that there was no correlation between dose and CAR peaks                                     |
| Porter D <sup>57</sup> ; CLL; N=14                               | 14-1100 (median, 160)                                | ORR, 57%; CR, 29%                                     | CRS: All grade, 64%; Grade ≥3, 43% Neurotoxicity: All grade, 36%; Grade ≥3, 7% | Degree of expansion of CTL019 cells and the duration of persistence were correlated to response. There was no correlation between T cell dose and response and between T cell dose and CRS incidence |
| Frigault MJ <sup>58</sup> ; MM; N=12                             | DL1: 100<br>DL2: 300                                 | CR: 75%; ORR: 100%                                    | CRS: All grade, 92%; Grade ≥3, 7% Neurotoxicity: All grade, 15%; Grade ≥3, 7%  | No correlation between dose and response was noted                                                                                                                                                   |
| Baumeister SH <sup>59</sup> ; AML/MDS and multiple myeloma; N=12 | DL1: 0.738;<br>DL2: 2.15;<br>DL3: 6.92;<br>DL4: 24.5 | No response. All patients received subsequent therapy | No toxicity                                                                    | Response was not seen                                                                                                                                                                                |

|                                                     |                                                 |                                                                                                                                  |                                                                                                              |                                                                                                                                                                                                       |
|-----------------------------------------------------|-------------------------------------------------|----------------------------------------------------------------------------------------------------------------------------------|--------------------------------------------------------------------------------------------------------------|-------------------------------------------------------------------------------------------------------------------------------------------------------------------------------------------------------|
| Ali SA <sup>60</sup> ; Multiple myeloma; N=12       | DL1: 21<br>DL2: 70<br>DL3: 210<br>DL4: 630      | All patients:<br>ORR, 33%; CR, 8%; DL1:<br>ORR/PR, 33%;<br>DL2: ORR, 0%;<br>DL3: ORR/<br>VGPR, 33%;<br>DL4: ORR,<br>66%; CR, 33% | CRS: All grade,<br>50%; Grade $\geq 3$ ,<br>25%<br>Neurotoxicity: All<br>grade, 25%;<br>Grade $\geq 3$ , 8%  | Response tended to be<br>higher/better with<br>higher dose. Incidence<br>of CRS also tended to<br>be higher at higher<br>dose levels                                                                  |
| Enblad G <sup>61</sup> ; Leukemia/Lymphoma; N=11    | DL1: 32<br>DL2: 160<br>DL3: 320                 | All patients:<br>ORR/CR, 40%;<br>DL1: ORR/CR,<br>50%; DL2:<br>ORR/CR, 25%;<br>DL3: ORR/CR,<br>44%                                | Not reported<br>clearly                                                                                      | No correlation between<br>dose and response.<br>Severe CRS and<br>neurotoxicity seen in<br>patients receiving high<br>dose                                                                            |
| Yan ZX <sup>62</sup> ; NHL; N=10                    | DL1: 25; DL2:<br>50; DL3: 100                   | ORR, 100%;<br>CR, 67% in all<br>dose levels<br>and in<br>combined<br>cohort                                                      | CRS: Grade 1,<br>100%<br>Neurotoxicity:<br>Grade $\geq 3$ , 10%<br>(only one case)                           | Overall response was<br>high and no correlation<br>between dose and<br>response. Study noted<br>that peak CART did not<br>correlate with dose but<br>was higher in patients<br>with CR                |
| Magnani CF <sup>63</sup> ; B-ALL; N=9 (adults only) | DL1: 70; DL2:<br>210; DL3:<br>525; DL4:<br>1050 | All adult<br>patients:<br>ORR/CR: 60%<br>DL1: NR; DL2:<br>ORR/CR,<br>100%; DL3:<br>ORR/CR, NR;<br>DL4: 100%                      | CRS: All grade,<br>23%; Grade $\geq 3$ ,<br>0%<br>No neurotoxicity                                           | Correlation seen<br>between dose &<br>disease response; &<br>CRS events were noted<br>only in highest dose                                                                                            |
| Gu R <sup>64</sup> ; B-ALL; N=9 (adults only)       | 350                                             | All adult<br>patients:<br>ORR/CR: 89%                                                                                            | CRS: All grade,<br>95%; Grade $\geq 3$ ,<br>45%<br>Neurotoxicity: All<br>grade, 65%;<br>Grade $\geq 3$ , 40% | Single dose was used in<br>the study and the study<br>did not analyze<br>correlation between<br>dose and response                                                                                     |
| Geyer MB <sup>65</sup> ; CLL; N=8                   | DL1: 210;<br>DL2: 700;<br>DL3: 2100             | All patients:<br>ORR/CR, 25%                                                                                                     | CRS: All grade,<br>50%; Grade $\geq 3$ ,<br>0%<br>No neurotoxicity                                           | Dose response was not<br>seen. Study noted that<br>CART expansion was<br>not satisfactory<br>possibly due to<br>insufficient<br>lymphodepletion. All<br>CRS events happened in<br>the high dose group |

|                                                       |                                                                                                                         |                                                                                                                   |                                                                                               |                                                                                                                                         |
|-------------------------------------------------------|-------------------------------------------------------------------------------------------------------------------------|-------------------------------------------------------------------------------------------------------------------|-----------------------------------------------------------------------------------------------|-----------------------------------------------------------------------------------------------------------------------------------------|
| Cruz CR <sup>66</sup> ; B-ALL; N=8                    | DL1 <sup>d</sup> : 19-34<br>DL2 <sup>d</sup> : 58-110                                                                   | All patients:<br>ORR, 50%; CR,<br>38%; DL1:<br>ORR, 50%; CR,<br>25%; DL2:<br>ORR/CR, 50%                          | No toxicity                                                                                   | Small sample size. CRs<br>were higher in DL2 but<br>overall response was<br>not different between<br>two groups                         |
| Kochenderfer JN <sup>67</sup> ; FL<br>and CLL; N=8    | DL1 <sup>d</sup> : 21<br>DL2 <sup>d</sup> : 70<br>DL3 <sup>d</sup> : 210<br>(Dose<br>represents<br>total CAR+<br>cells) | All patients:<br>ORR, 75%; CR,<br>13%; DL1:<br>ORR/PR 50%;<br>DL2: ORR,<br>100%; CR,<br>33%; DL3:<br>ORR/PR, 100% | CRS: All grade,<br>NR; Grade ≥3,<br>13%<br>Neurotoxicity: All<br>grade, NR%;<br>Grade ≥3, 13% | Small sample size. Only<br>DL2 had CR and<br>response was better<br>than DL3                                                            |
| Bao F <sup>68</sup> ; DLBCL; N=5                      | 210 or 263.9                                                                                                            | All patients:<br>ORR, 75%; CR,<br>50%                                                                             | CRS: All grade,<br>100%; Grade ≥3,<br>0%<br>Neurotoxicity: NR                                 | Response and CRS<br>correlated with peak<br>CAR expansion                                                                               |
| Eom HS <sup>69</sup> ; Multiple<br>subtypes; N=4      | DL1: 100<br>DL2: 200<br>DL3: 400                                                                                        | DL1: 1 PR;<br>DL2: 1 PD;<br>DL3: 1 SD, 1<br>CR                                                                    | No toxicity                                                                                   | Study not designed to<br>test dose response                                                                                             |
| Ritchie DS <sup>70</sup> ; AML;<br>N=4                | DL1: 500;<br>DL2: 1000;<br>DL3: 1140;<br>DL4: 1290                                                                      | Transient<br>response seen<br>at higher<br>doses (1140<br>& 1290)                                                 | CRS: All grade,<br>25% (grade<br>details NR)<br>No neurotoxicity                              | Study not designed to<br>test dose response                                                                                             |
| Zhang Q <sup>71</sup> ; B-ALL; N=4                    | no details                                                                                                              | All patients:<br>ORR/CR, 75%                                                                                      | CRS: All grade,<br>100%; Grade ≥3,<br>0%<br>Neurotoxicity: NR                                 | Study noted that<br>efficacy positively<br>correlated with<br>abundance of CAR and<br>immune cell sub-<br>populations in bone<br>marrow |
| Kalos M <sup>72</sup> ; CLL; N=3                      | DL1: 140;<br>DL2: 580;<br>DL3: 1100                                                                                     | CR: 2 patients<br>PR: 1 patient                                                                                   | NR                                                                                            | CR was seen at highest<br>and lowest dose                                                                                               |
| Weng J <sup>73</sup> ; B-ALL; N=3<br>(2, adults only) | DL1: 3.5;<br>DL2: 35; DL3:<br>70                                                                                        | All 3 patients<br>had CR                                                                                          | CRS: All grade,<br>100%; Grade ≥3,<br>33%<br>No neurotoxicity                                 | Small sample size. CR<br>was seen at all doses                                                                                          |

<sup>a</sup>calculated for 70 kg or 1.6 m<sup>2</sup> if dose was not flat; <sup>b</sup>adverse events are reported for the whole cohort;

<sup>c</sup>Dose was not categorized by authors and categories were not assigned for this study because the study did not report any correlation or lack of correlation; <sup>d</sup>dose levels assigned for the review; NR, not reported; Patients with age >18 years were considered as adults; <sup>e</sup>Dose was not categorized by authors and categories were not assigned for this study because overall response rate was very low or very high.

**Table S4.** Cmax and AUC reported for CAR-T cells in clinical studies

| First Author (reference) | CART cell peak (cells/ $\mu$ l)                                                                                                  | VCN peak (copies/ $\mu$ g DNA)                                                                                                         | AUC (dxcopies/ $\mu$ g DNA)                     |
|--------------------------|----------------------------------------------------------------------------------------------------------------------------------|----------------------------------------------------------------------------------------------------------------------------------------|-------------------------------------------------|
| Raje N <sup>26</sup>     | NR                                                                                                                               | Range, 90-1800000 <sup>a</sup>                                                                                                         | NR                                              |
| Munshi NC <sup>4</sup>   | NR                                                                                                                               | 231278                                                                                                                                 | 2860340                                         |
| Xu J <sup>50</sup>       | NR                                                                                                                               | 74800 (range, 2282-5396510)                                                                                                            | NR                                              |
| Cohen AD <sup>33</sup>   | NR                                                                                                                               | 75339 in responders; 6368 in non-responders                                                                                            | 561796 in responders<br>52391 in non-responders |
| Wang D <sup>48</sup>     | NR                                                                                                                               | 80000 (range, 1000-250000) <sup>a</sup>                                                                                                | 700000 (range, 7000-3000000) <sup>a</sup>       |
| Frigault M <sup>58</sup> | NR                                                                                                                               | 90,147 (10,068–351,000)                                                                                                                | 644,965 (range, 76,916– 3,026,634)              |
| Ali SA <sup>60</sup>     | Range, 0-285 <sup>a</sup>                                                                                                        | NR                                                                                                                                     | NR                                              |
| Cao J <sup>49</sup>      | 406 (95% CI 183–596) in G3+ CRS vs 109 (95% CI 76–142) in G1-2 CRS                                                               | 118 100 (95% CI 60 700-201 900) in G3+ vs 64,430 (95% CI 43 760-76 220) in G1-2                                                        | NR                                              |
| Wang J <sup>38</sup>     | NR                                                                                                                               | 12650 (range, 187–44 509)                                                                                                              | NR                                              |
| Roddie C <sup>45</sup>   | 468 (range, 88-8627) (per ml)                                                                                                    | 127151.74 (range NR)                                                                                                                   | 1251802.4 (range NR)                            |
| Abramson JS <sup>2</sup> | NR                                                                                                                               | 23928.2                                                                                                                                | 213730.1                                        |
| Ying Z <sup>14</sup>     | 24 (1-582)                                                                                                                       | 25333.5 (range, 854-250768)                                                                                                            | 249744.8 (range, 22089.3-3241025.5)             |
| Fowler NH <sup>8</sup>   | NR                                                                                                                               | 3000 in non-responders<br>6280 in responders                                                                                           | NR                                              |
| Schuster SJ <sup>9</sup> | NR                                                                                                                               | 5530                                                                                                                                   | 64600                                           |
| Hu Y <sup>56</sup>       | 342 (95% CI, 140–532) and 96 (95% CI, 61.5–132.8) in the grade 3 CRS group and in the non-CRS or grade 1 or 2 CRS group (per ml) | 9.9e5 (95% CI, 61.5e6 – 132.8e6) and 2.2e5 (95% CI 1.5e5 –4.8e5) in the grade 3 CRS group and in the non-CRS or grade 1 or 2 CRS group | NR                                              |
| Gill S <sup>46</sup>     | 536 (range, 0-3640)                                                                                                              | 90991 (range, 966-201556)                                                                                                              | NR                                              |
| Turtle CJ <sup>31</sup>  | 20-120 CD4; 10-1000 CD8                                                                                                          | NR                                                                                                                                     | NR                                              |
| Yan ZX <sup>62</sup>     | 4e5 (range, 0-6.5e5) (per ml) <sup>a</sup>                                                                                       | NR                                                                                                                                     | NR                                              |
| Ying Z <sup>34</sup>     | NR                                                                                                                               | 2000-80000 <sup>a</sup>                                                                                                                | NR                                              |
| Enblad G <sup>61</sup>   | NR                                                                                                                               | Range, 80-10e8 <sup>a</sup> (per 500 ng)                                                                                               | NR                                              |

|                             |                                                                             |                                                                            |                                         |
|-----------------------------|-----------------------------------------------------------------------------|----------------------------------------------------------------------------|-----------------------------------------|
| Shah BD <sup>17</sup>       | NR                                                                          | Range, 0-443880                                                            | NR                                      |
| Wang X <sup>52</sup>        | NR                                                                          | 280 (range, 0-925) in NHL1 and 692 (range, 267-27790) in NHL2              | NR                                      |
| Geyer MB <sup>41</sup>      | NR                                                                          | Range, 400-2e6 <sup>a</sup>                                                | NR                                      |
| Neelapu S <sup>6</sup>      | 30 (10-80) <sup>a</sup>                                                     | NR                                                                         | 462.3 (range, 5.1-14329.3) (d*cells/ul) |
| Wang M <sup>13</sup>        | 70 (1-3000) <sup>a</sup>                                                    | NR                                                                         | NR                                      |
| Shah BD <sup>16</sup>       | 40.47 (range, 6.04-76.70) in complete responders                            | NR                                                                         | NR                                      |
| Bao F <sup>68</sup>         | 276.16 cells (range, 8.8–634)                                               | NR                                                                         | NR                                      |
| Sauter CS <sup>55</sup>     | 27 (range, 9-141) in progression-free and 22 (range, 0.1-851) in progressed | NR                                                                         | NR                                      |
| Magnani CF <sup>63</sup>    | NR                                                                          | 1 e6                                                                       | 1.08 e6 (range, 3,915.5–4.80 e6)        |
| Cui R <sup>44</sup>         | NR                                                                          | 3540 in HBsAg-positive patients and 4801 in for anti-HBc positive patients | NR                                      |
| Wang CM <sup>47</sup>       | NR                                                                          | Range, 500-4250 <sup>a</sup>                                               | NR                                      |
| Ramos CA <sup>21</sup>      | NR                                                                          | Range, 1000-100000 <sup>a</sup>                                            | NR                                      |
| Ramos CA <sup>53</sup>      | NR                                                                          | Range, 2-3000 <sup>a</sup>                                                 | NR                                      |
| Ritchie DS <sup>70</sup>    | NR                                                                          | Range, 0-700 <sup>a</sup> (copies/1000 cells)                              | NR                                      |
| Baumeister SH <sup>59</sup> | 290 for CD8 and 15 for CD4 <sup>a</sup>                                     | NR                                                                         | NR                                      |

Median and/or range are reported unless otherwise indicated. NR, not reported. <sup>a</sup>Data estimated approximately from figures.

**Supplementary Table S5.** Time to response, peak expansion, and CRS and/or neurotoxicity in studies with sample size

| First Author [#]<br>Indication              | Onset time for<br>peak expansion                                                      | Onset time<br>for response    | Onset time for CRS<br>Onset time for neurotoxicity (if<br>reported separately) |
|---------------------------------------------|---------------------------------------------------------------------------------------|-------------------------------|--------------------------------------------------------------------------------|
| Bishop M <sup>1</sup><br>LBCL               | 7-11 days <sup>a</sup>                                                                | NR                            | 4 (1-27) days for CRS<br>5 (3-93) days for neurotoxicity                       |
| Abramson JS <sup>2</sup><br>DLBCL           | 12 (IQR, 10-14)<br>days                                                               | 1 (range, 0.7-<br>8.9) months | 5 (range, 1-14) days for CRS<br>9 (range, 1-66) days for<br>neurotoxicity      |
| Munshi NC <sup>4</sup><br>Multiple myeloma  | 11 (range, 7-21)<br>days                                                              | 1 (range, 0.5-<br>8.8) months | 1 (IQR, 1-12) days for CRS<br>2 (IQR, 2-10) days for<br>neurotoxicity          |
| Neelapu SS <sup>6</sup><br>DLBCL            | 7 days <sup>a</sup>                                                                   | 1 (range, 0.8-<br>6) months   | 2 (range, 1-12) days for CRS<br>5 (range, 1-17) days for<br>neurotoxicity      |
| Berdeja JG <sup>7</sup><br>Multiple myeloma | 12.7 (range, 8.7-<br>54.6) days                                                       | 2.6 (range, 1-<br>6.1) months | 7 (IQR, 5-8) days for CRS<br>8 (IQR, 6-8) days for<br>neurotoxicity            |
| Fowler NH <sup>8</sup><br>FL                | 10 (IQR, 9-14) days<br>in responders<br>13 (IQR, 10-15)<br>days in non-<br>responders | NR                            | 4 (IQR, 2-7) days for CRS<br>9 (IQR, 5-35) days for<br>neurotoxicity           |
| Sesques P <sup>12</sup><br>DLBCL            | NR                                                                                    | NR                            | 3 (range, 0-8) days for CRS<br>6 (range, 4-17) days for<br>neurotoxicity       |
| Li M <sup>11</sup><br>B-ALL                 | 11-15 days <sup>a</sup>                                                               | NR                            | NR                                                                             |
| Wang M <sup>13</sup><br>MCL                 | 15 days                                                                               | NR                            | 2 (range, 1-13) days for CRS<br>7 (range, 1-32) days for<br>neurotoxicity      |
| Ying Z <sup>14</sup><br>B-cell lymphoma     | 8.5 (range, 4-27)<br>days                                                             | 28 days                       | 4.5 (range, 1-10) days for CRS<br>8.5 (range, 1-49) days for<br>neurotoxicity  |
| Zhao WH <sup>15</sup><br>Multiple myeloma   | NR                                                                                    | NR                            | NR                                                                             |
| Shah BD <sup>16</sup><br>B-ALL              | 15 (IQR, 11-16)<br>days                                                               | NR                            | 5 (IQR, 3-7) days for CRS<br>9 (IQR, 7-11) days for<br>neurotoxicity           |
| Shah BD <sup>17</sup><br>ALL                | 7-14 days                                                                             | NR                            | 2 (IQR, 1-5) days for CRS<br>6 (IQR, 3-8) days for<br>neurotoxicity            |
| Jiang H <sup>18</sup><br>B-ALL              | NR                                                                                    | 1 month<br>(range, NR)        | NR                                                                             |
| Ramos CA <sup>21</sup>                      | 2-3 weeks                                                                             | NR                            | 10 days (range, 7-24 days) for                                                 |

|                                            |                                                                 |                        |                                                                           |
|--------------------------------------------|-----------------------------------------------------------------|------------------------|---------------------------------------------------------------------------|
| HL                                         |                                                                 |                        | CRS                                                                       |
| Pan J <sup>25</sup><br>B-ALL               | 12-15 days                                                      | NR                     | 7 (range, 0-17) days for CRS<br>8 (range, 1-17) days for neurotoxicity    |
| Raje N <sup>26</sup><br>Multiple myeloma   | 11 (range <sup>a</sup> , 7-30) days at doses ≥150 million cells | NR                     | 2 (range, 1-25) days for CRS                                              |
| Turtle CJ <sup>31</sup><br>B-ALL           | Approximately 10 days <sup>a</sup>                              | NR                     | 6 hours to 9 days for CRS<br>1-11 days for neurotoxicity                  |
| Schuster SJ <sup>9</sup><br>DLBCL/FL       | 8 days (range, 6-14 days)                                       | NR                     | NR                                                                        |
| Cohen AD <sup>33</sup><br>Multiple myeloma | Range, 10-14 days                                               | NR                     | 4 (range, 1-11) days for CRS                                              |
| Ying Z <sup>34</sup><br>B cell lymphoma    | 7-15 days                                                       | NR                     | NR                                                                        |
| Wang J <sup>38</sup><br>B-ALL              | 11 days (range, 7-14 days)                                      | 14 days                | NR                                                                        |
| Casadei B <sup>37</sup><br>LBCL            | NR                                                              | 1-3 months             | 2 (range, 0-7) days for CRS<br>4 (range, 1-12) days for neurotoxicity     |
| Zhou X <sup>39</sup><br>DLBCL              | 14 days (range, NR)                                             | 58 (range, 29-63) days | 6 (range, 2-7) days for CRS<br>33 days for neurotoxicity (only 1 patient) |
| Hirayama AV <sup>40</sup><br>FL            | NR                                                              | 29 (range, 27-42) days | NR                                                                        |
| Geyer MB <sup>41</sup><br>CLL/NHL          | 7-14 days                                                       | NR                     | 1 (range, 0-2) days for CRS                                               |
| Rossi J <sup>42</sup><br>DLBCL and others  | 7-14 days                                                       | NR                     | NR                                                                        |
| Cui R <sup>44</sup><br>DLBCL               | 7-14 days                                                       | NR                     | 3 days (range, 1-8 days) for CRS                                          |
| Roddie C. <sup>45</sup><br>B-ALL           | 13 (range, 7-21) days                                           | NR                     | 6 (range, 2-31) days for CRS<br>22 (range, 14-41) days for neurotoxicity  |
| Gill S <sup>46</sup><br>CLL                | 10 (range, 7-28) days                                           | NR                     | 2 (range, 2-12) days for CRS                                              |
| Wang CM <sup>47</sup><br>HL                | 3-9 days                                                        | NR                     | Fever within 1 day; other toxicities 2-4 weeks                            |
| Wang D <sup>48</sup><br>MM                 | 12 (range, 7-26) days                                           | 15 (range, 14-62) days | 2 (range, 0-7) days                                                       |
| Cao J <sup>49</sup><br>ALL                 | 7-14 days                                                       | 1 month                | 6 (range, 1-9) days                                                       |
| Xu J <sup>50</sup><br>Multiple myeloma     | 6-30 days <sup>a</sup>                                          | NR                     | 7-14 days                                                                 |
| Cornell R <sup>51</sup><br>MM and PCL      | 28 days                                                         | NR                     | NR                                                                        |
| Wang X <sup>52</sup>                       | Approximately 2                                                 | NR                     | NR                                                                        |

|                                                                |                                                                            |                      |                                                                                                                     |
|----------------------------------------------------------------|----------------------------------------------------------------------------|----------------------|---------------------------------------------------------------------------------------------------------------------|
| NHL                                                            | weeks (range NR)                                                           |                      |                                                                                                                     |
| Ramos CA <sup>53</sup><br>ALL/NHL                              | Within 7 days<br>(range NR)                                                | NR                   | NR                                                                                                                  |
| Sauter CS <sup>55</sup><br>NHL                                 | NR                                                                         | NR                   | 2.5 (range, 0-10) days for CRS<br>5 (range, 1-6) days for<br>neurotoxicity                                          |
| Hu Y <sup>56</sup><br>ALL                                      | 7-10 days                                                                  | 1 month              | 2.5 (range, 1-10) days for CRS                                                                                      |
| Porter D <sup>57</sup><br>CLL                                  | NR                                                                         | NR                   | 7 (range, 1-14) days                                                                                                |
| Frigault MJ <sup>58</sup><br>MM                                | 11 (range, 7-21)<br>days                                                   | 28 days              | 2.5 (range: 0-6) days (DL1); 4.5<br>(range, 3-6) days (DL2) for CRS<br>Neurotoxicity: 2 days (DL1); 6<br>days (DL2) |
| Baumeister SH <sup>59</sup><br>AML/MDS and<br>multiple myeloma | 2 weeks (range NR)<br>for CD8 cells<br>1 month (range NR)<br>for CD4 cells | NR                   | NR                                                                                                                  |
| Ali SA <sup>60</sup><br>Multiple myeloma                       | 7-15 days <sup>a</sup>                                                     | NR                   | NR                                                                                                                  |
| Enblad G <sup>61</sup><br>Leukemia/Lymphoma                    | 7 days (range, 7-35<br>days) <sup>a</sup>                                  | NR                   | NR                                                                                                                  |
| Yan ZX <sup>62</sup><br>NHL                                    | 11-29 days                                                                 | NR                   | 6 (range, 3-11) days for CRS                                                                                        |
| Magnani CF <sup>63</sup><br>B-ALL                              | 14 (range, 7-22)<br>days                                                   | NR                   | NR                                                                                                                  |
| Gu R <sup>64</sup><br>B-ALL                                    | 14 days (range NR)                                                         | NR                   | 4 days (range NR)                                                                                                   |
| Geyer MB <sup>65</sup><br>CLL                                  | NR                                                                         | NR                   | 1.5 (range, 1-3) days for CRS                                                                                       |
| Bao F <sup>68</sup><br>DLBCL                                   | 7-14 days                                                                  | NR                   | NR                                                                                                                  |
| Eom HS <sup>69</sup><br>Multiple subtypes                      | NR                                                                         | 4 weeks <sup>a</sup> | NR                                                                                                                  |
| Ritchie DS <sup>70</sup><br>AML                                | 9 (range, 4-14)<br>days <sup>a</sup>                                       |                      | NR                                                                                                                  |
| Zhang Q <sup>71</sup><br>B-ALL                                 | 14 days                                                                    | NR                   | Within 14 days                                                                                                      |
| Kalos M <sup>72</sup><br>CLL                                   | 7-30 days <sup>a</sup>                                                     | NR                   | 7-21 days (all toxicities)                                                                                          |
| Weng J <sup>73</sup><br>B-ALL                                  | 12, 10 & 10 days                                                           | 46, 10 & 18<br>days  | 7, 9 and 7 days for CRS                                                                                             |
| Feng J <sup>74</sup><br>T-LBL                                  | NR                                                                         | 4 weeks              | NR                                                                                                                  |

Average or median time to onset was reported in the studies. NR, not reported. IQR, inter quartile range. <sup>a</sup>Estimated from the data presented in the figure/table.



**Supplementary Table S6.** Association of tumor burden with response, CRS and neurotoxicity in studies with sample size, N≤50

| First Author [#]<br>Indication             | Tumor burden cut-off                           | Association with response, CRS and neurotoxicity                                                                                                                                                                                     |
|--------------------------------------------|------------------------------------------------|--------------------------------------------------------------------------------------------------------------------------------------------------------------------------------------------------------------------------------------|
| Abramson JS <sup>2</sup><br>DLBCL          | SPD≥50 cm <sup>2</sup>                         | Patients with low tumor burden (SPD<50 cm <sup>2</sup> ) had higher rate of overall and complete response. High TB was associated with CAR-T peak and higher incidence of CRS and neurological events                                |
| Zhang X <sup>3</sup><br>B-ALL              | Not defined                                    | Patients with >20% bone marrow blasts had lower CR rate                                                                                                                                                                              |
| Munshi NC <sup>4</sup><br>Multiple myeloma | BMPCs≥50%                                      | Patients with BPMCs<50% had higher rate of overall response                                                                                                                                                                          |
| Neelapu SS <sup>6</sup><br>DLBCL           | Disease burden≥10 cm                           | Patients without bulky disease had better overall response rate                                                                                                                                                                      |
| Schuster SJ <sup>9</sup><br>DLBCL          | Tumor volume≥100 ml                            | Patients with tumor volume<100 ml had better overall response rate                                                                                                                                                                   |
| Sesques P <sup>12</sup><br>DLBCL           | Disease burden>10 cm                           | Patients with bulky disease had worse OS                                                                                                                                                                                             |
| Li M <sup>11</sup> B-ALL                   | High TB Group:<br>Disease burden ≥5% BM blasts | Patients in high tumor burden group had comparatively lower CR rate, OS and EFS. Incidence of severe CRS was high in patients with high TB but there was no difference in neurotoxicity. High TB was associated with high CAR-T peak |
| Wang M <sup>13</sup><br>MCL                | Tumor burden≥median                            | Patients with tumor burden≥median had better overall response rate                                                                                                                                                                   |
| Jiang H <sup>18</sup><br>B-ALL             | Disease burden≥5% BM blasts                    | Patients with disease burden≥5% BM blasts had severe CRS incidence                                                                                                                                                                   |
| Park JH <sup>19</sup><br>B-ALL             | Disease burden≥5% BM blasts or EMD             | Patients with disease burden≥5% BM blasts had severe CRS and neurotoxicity incidence; lower overall response rate and lower event-free survival and OS                                                                               |
| Raje N <sup>26</sup><br>Multiple myeloma   | Tumor burden≥50% CD138-positive cells          | Patients with tumor burden ≥50% CD138-positive cells had lower overall response rate; no difference was noted in incidence of CRS                                                                                                    |

|                                        |                                   |                                                                                                                                                                                                           |
|----------------------------------------|-----------------------------------|-----------------------------------------------------------------------------------------------------------------------------------------------------------------------------------------------------------|
| An F <sup>29</sup><br>B-ALL            | Bone marrow blasts $\geq$ 20%     | No difference in response between patients with BM blasts $<$ 20% and $\geq$ 20%                                                                                                                          |
| Turtle CJ <sup>31</sup><br>B-ALL       | Not defined                       | Study used a tumor burden-based risk adaptive dosing in patients                                                                                                                                          |
| Schuster SJ <sup>32</sup><br>DLBCL/FL  | Not defined                       | Tumor burden was not significantly different between responders (median tumor size, 22 cm <sup>2</sup> ; range, 3-100) and non-responders (median tumor size, 30 cm <sup>2</sup> ; range, 13-157)         |
| Tu S <sup>35</sup><br>ALL              | Bone marrow blasts $\geq$ 50%     | Patients with low tumor burden ( $<$ 50% blasts) were more likely to have MRD-negative remission                                                                                                          |
| Turtle CJ <sup>36</sup><br>CLL         | Not defined                       | Linear correlation between CAR-T cell peak and tumor burden; but patients with high tumor burden had high CRS, neurotoxicity incidence; patients with higher lymph node bulk were less likely to responds |
| Wang J <sup>38</sup><br>B-ALL          | Not defined                       | Patients with over 30% blasts had lower response rate*                                                                                                                                                    |
| Zhou X <sup>39</sup><br>DLBCL          | Disease scale $\geq$ 5 cm         | Patients with low tumor burden ( $<$ 5 cm) had comparatively less response rate                                                                                                                           |
| Geyer MB <sup>41</sup><br>CLL/NHL      | Not defined                       | No correlation between tumor burden and response                                                                                                                                                          |
| Roddie C. <sup>45</sup><br>B-ALL       | Not defined                       | Study used risk adoptive dosing design in patients with high TB. Authors noted that immunotoxicity was low.                                                                                               |
| Cao J <sup>49</sup><br>ALL             | Not defined                       | No correlation with response or CRS                                                                                                                                                                       |
| Xu J <sup>50</sup><br>Multiple myeloma | Clonal BM plasma cells $\geq$ 10% | No difference in CRS events between two groups                                                                                                                                                            |
| Davila M <sup>54</sup><br>B-ALL        | Not Defined                       | Study noted that high TB was associated with response and with severe CRS                                                                                                                                 |
| Sauter CS <sup>55</sup><br>NHL         | Not defined                       | No correlation between SPD and rate of response or CRS or neurotoxicity                                                                                                                                   |
| Hu Y <sup>56</sup>                     | Not defined                       | Tumor burden at the end of                                                                                                                                                                                |

|                                   |                        |                                                                                                                                                                                                    |
|-----------------------------------|------------------------|----------------------------------------------------------------------------------------------------------------------------------------------------------------------------------------------------|
| ALL                               |                        | lymphodepletion regimen correlated with grade 3 CRS                                                                                                                                                |
| Magnani CF <sup>63</sup><br>B-ALL | Not defined            | Patients with low tumor burden (<5%) after lymphodepletion tended to have higher response rate*; CAR-T cell expansion (AUC, C <sub>max</sub> were higher in patients with high tumor burden (>15%) |
| Gu R <sup>64</sup><br>B-ALL       | Bone marrow blasts≥50% | Patients with high tumor burden (≥50%) had higher incidence of severe CRS. No correlation with response*.                                                                                          |
| Zhang Q <sup>71</sup><br>B-ALL    | Not defined            | Patients with high tumor burden (>10%) did not respond or had relapse within 2 months                                                                                                              |
| Kalos M <sup>72</sup><br>CLL      | Not defined            | All 3 patients had >40% tumor burden in the BM and all three had response                                                                                                                          |

SPD, Sum of product diameter; BMPCs, Bone marrow plasma cells; UNL, upper normal level; EMD, extramedullary disease; OS, overall survival; \*interpretation based on data from the study

## References

1. Bishop MR, Dickinson M, Purtill D, et al. Second-Line Tisagenlecleucel or Standard Care in Aggressive B-Cell Lymphoma. *N Engl J Med* 2022;386(7):629-39. doi: 10.1056/NEJMoa2116596 [published Online First: 20211214]
2. Abramson JS, Palomba ML, Gordon LI, et al. Lisocabtagene maraleucel for patients with relapsed or refractory large B-cell lymphomas (TRANSCEND NHL 001): a multicentre seamless design study. *The Lancet* 2020;396(10254):839-52. doi: 10.1016/s0140-6736(20)31366-0
3. Zhang X, Yang J, Li J, et al. Factors associated with treatment response to CD19 CAR-T therapy among a large cohort of B cell acute lymphoblastic leukemia. *Cancer Immunol Immunother* 2021 doi: 10.1007/s00262-021-03009-z [published Online First: 20210807]
4. Munshi NC, Anderson LD, Jr., Shah N, et al. Idecabtagene Vicleucel in Relapsed and Refractory Multiple Myeloma. *N Engl J Med* 2021;384(8):705-16. doi: 10.1056/NEJMoa2024850 [published Online First: 2021/02/25]
5. Kittai AS, Huang Y, Gordon M, et al. Comorbidities Predict Inferior Survival in Patients Receiving Chimeric Antigen Receptor T Cell Therapy for Diffuse Large B Cell Lymphoma: A Multicenter Analysis. *Transplant Cell Ther* 2021;27(1):46-52. doi: 10.1016/j.bbmt.2020.09.028 [published Online First: 20200929]
6. Neelapu SS, Locke FL, Bartlett NL, et al. Axicabtagene Ciloleucel CAR T-Cell Therapy in Refractory Large B-Cell Lymphoma. *N Engl J Med* 2017;377(26):2531-44. doi: 10.1056/NEJMoa1707447 [published Online First: 2017/12/12]
7. Berdeja JG, Madduri D, Usmani SZ, et al. Ciltacabtagene autoleucel, a B-cell maturation antigen-directed chimeric antigen receptor T-cell therapy in patients with relapsed or refractory multiple myeloma (CARTITUDE-1): a phase 1b/2 open-label study. *The Lancet* 2021;398(10297):314-24. doi: 10.1016/s0140-6736(21)00933-8
8. Fowler NH, Dickinson M, Dreyling M, et al. Tisagenlecleucel in adult relapsed or refractory follicular lymphoma: the phase 2 ELARA trial. *Nature Medicine* 2022;28(2):325-32. doi: 10.1038/s41591-021-01622-0
9. Schuster SJ, Bishop MR, Tam CS, et al. Tisagenlecleucel in Adult Relapsed or Refractory Diffuse Large B-Cell Lymphoma. *N Engl J Med* 2019;380(1):45-56. doi: 10.1056/NEJMoa1804980 [published Online First: 2018/12/07]
10. Itzhaki O, Jacoby E, Nissani A, et al. Head-to-head comparison of in-house produced CD19 CAR-T cell in ALL and NHL patients. *J Immunother Cancer* 2020;8(1) doi: 10.1136/jitc-2019-000148 [published Online First: 2020/03/11]
11. Li M, Xue SL, Tang X, et al. The differential effects of tumor burdens on predicting the net benefits of ssCART-19 cell treatment on r/r B-ALL patients. *Sci Rep* 2022;12(1):378. doi: 10.1038/s41598-021-04296-3 [published Online First: 20220110]
12. Sesques P, Ferrant E, Safar V, et al. Commercial anti-CD19 CAR T cell therapy for patients with relapsed/refractory aggressive B cell lymphoma in a European center. *Am J Hematol* 2020;95(11):1324-33. doi: 10.1002/ajh.25951 [published Online First: 2020/08/04]
13. Wang M, Munoz J, Goy A, et al. KTE-X19 CAR T-Cell Therapy in Relapsed or Refractory Mantle-Cell Lymphoma. *N Engl J Med* 2020;382(14):1331-42. doi: 10.1056/NEJMoa1914347 [published Online First: 2020/04/04]
14. Ying Z, Yang H, Guo Y, et al. Relmacabtagene autoleucel (relma-cel) CD19 CAR-T therapy for adults with heavily pretreated relapsed/refractory large B-cell lymphoma in China. *Cancer Med* 2021;10(3):999-1011. doi: 10.1002/cam4.3686 [published Online First: 2021/01/01]
15. Zhao WH, Liu J, Wang BY, et al. A phase 1, open-label study of LCAR-B38M, a chimeric antigen receptor T cell therapy directed against B cell maturation antigen, in patients with relapsed or

- refractory multiple myeloma. *J Hematol Oncol* 2018;11(1):141. doi: 10.1186/s13045-018-0681-6 [published Online First: 2018/12/24]
16. Shah BD, Ghobadi A, Oluwole OO, et al. KTE-X19 for relapsed or refractory adult B-cell acute lymphoblastic leukaemia: phase 2 results of the single-arm, open-label, multicentre ZUMA-3 study. *Lancet* 2021;398(10299):491-502. doi: 10.1016/S0140-6736(21)01222-8 [published Online First: 20210604]
  17. Shah BD, Bishop MR, Oluwole OO, et al. KTE-X19 anti-CD19 CAR T-cell therapy in adult relapsed/refractory acute lymphoblastic leukemia: ZUMA-3 phase 1 results. *Blood* 2021;138(1):11-22. doi: 10.1182/blood.202009098 [published Online First: 2021/04/08]
  18. Jiang H, Liu L, Guo T, et al. Improving the safety of CAR-T cell therapy by controlling CRS-related coagulopathy. *Ann Hematol* 2019;98(7):1721-32. doi: 10.1007/s00277-019-03685-z [published Online First: 2019/05/06]
  19. Park JH, Riviere I, Gonen M, et al. Long-Term Follow-up of CD19 CAR Therapy in Acute Lymphoblastic Leukemia. *N Engl J Med* 2018;378(5):449-59. doi: 10.1056/NEJMoa1709919 [published Online First: 2018/02/01]
  20. Summers C, Wu QV, Annesley C, et al. Hematopoietic Cell Transplantation after CD19 Chimeric Antigen Receptor T Cell-Induced Acute Lymphoblastic Lymphoma Remission Confers a Leukemia-Free Survival Advantage. *Transplant Cell Ther* 2021 doi: 10.1016/j.jtct.2021.10.003 [published Online First: 20211010]
  21. Ramos CA, Grover NS, Beaven AW, et al. Anti-CD30 CAR-T Cell Therapy in Relapsed and Refractory Hodgkin Lymphoma. *J Clin Oncol* 2020;38(32):3794-804. doi: 10.1200/JCO.20.01342 [published Online First: 2020/07/24]
  22. Wudhikarn K, Flynn JR, Riviere I, et al. Interventions and outcomes of adult patients with B-ALL progressing after CD19 chimeric antigen receptor T-cell therapy. *Blood* 2021;138(7):531-43. doi: 10.1182/blood.202009515
  23. Shao M, Yu Q, Teng X, et al. CRS-related coagulopathy in BCMA targeted CAR-T therapy: a retrospective analysis in a phase I/II clinical trial. *Bone Marrow Transplant* 2021;56(7):1642-50. doi: 10.1038/s41409-021-01226-9 [published Online First: 2021/02/21]
  24. Frey NV, Shaw PA, Hexner EO, et al. Optimizing Chimeric Antigen Receptor T-Cell Therapy for Adults With Acute Lymphoblastic Leukemia. *J Clin Oncol* 2020;38(5):415-22. doi: 10.1200/JCO.19.01892 [published Online First: 2019/12/10]
  25. Pan J, Niu Q, Deng B, et al. CD22 CAR T-cell therapy in refractory or relapsed B acute lymphoblastic leukemia. *Leukemia* 2019;33(12):2854-66. doi: 10.1038/s41375-019-0488-7 [published Online First: 2019/05/22]
  26. Raje N, Berdeja J, Lin Y, et al. Anti-BCMA CAR T-Cell Therapy bb2121 in Relapsed or Refractory Multiple Myeloma. *N Engl J Med* 2019;380(18):1726-37. doi: 10.1056/NEJMoa1817226 [published Online First: 2019/05/03]
  27. Turtle CJ, Hanafi LA, Berger C, et al. Immunotherapy of non-Hodgkin's lymphoma with a defined ratio of CD8+ and CD4+ CD19-specific chimeric antigen receptor-modified T cells. *Sci Transl Med* 2016;8(355):355ra116. doi: 10.1126/scitranslmed.aaf8621 [published Online First: 2016/09/09]
  28. Frey NV, Gill S, Hexner EO, et al. Long-Term Outcomes From a Randomized Dose Optimization Study of Chimeric Antigen Receptor Modified T Cells in Relapsed Chronic Lymphocytic Leukemia. *J Clin Oncol* 2020;38(25):2862-71. doi: 10.1200/JCO.19.03237 [published Online First: 2020/04/17]
  29. An F, Wang H, Liu Z, et al. Influence of patient characteristics on chimeric antigen receptor T cell therapy in B-cell acute lymphoblastic leukemia. *Nat Commun* 2020;11(1):5928. doi: 10.1038/s41467-020-19774-x [published Online First: 2020/11/25]

30. Li C, Cao W, Que Y, et al. A phase I study of anti-BCMA CAR T cell therapy in relapsed/refractory multiple myeloma and plasma cell leukemia. *Clin Transl Med* 2021;11(3):e346. doi: 10.1002/ctm2.346
31. Turtle CJ, Hanafi LA, Berger C, et al. CD19 CAR-T cells of defined CD4+:CD8+ composition in adult B cell ALL patients. *J Clin Invest* 2016;126(6):2123-38. doi: 10.1172/JCI85309 [published Online First: 2016/04/26]
32. Schuster SJ, Svoboda J, Chong EA, et al. Chimeric Antigen Receptor T Cells in Refractory B-Cell Lymphomas. *N Engl J Med* 2017;377(26):2545-54. doi: 10.1056/NEJMoa1708566 [published Online First: 2017/12/12]
33. Cohen AD, Garfall AL, Stadtmauer EA, et al. B cell maturation antigen-specific CAR T cells are clinically active in multiple myeloma. *J Clin Invest* 2019;129(6):2210-21. doi: 10.1172/JCI126397 [published Online First: 2019/03/22]
34. Ying Z, Huang XF, Xiang X, et al. A safe and potent anti-CD19 CAR T cell therapy. *Nat Med* 2019;25(6):947-53. doi: 10.1038/s41591-019-0421-7 [published Online First: 2019/04/24]
35. Tu S, Huang R, Guo Z, et al. Shortening the ex vivo culture of CD19-specific CAR T-cells retains potent efficacy against acute lymphoblastic leukemia without CAR T-cell-related encephalopathy syndrome or severe cytokine release syndrome. *Am J Hematol* 2019;94(12):E322-E25. doi: 10.1002/ajh.25630 [published Online First: 2019/09/07]
36. Turtle CJ, Hay KA, Hanafi LA, et al. Durable Molecular Remissions in Chronic Lymphocytic Leukemia Treated With CD19-Specific Chimeric Antigen Receptor-Modified T Cells After Failure of Ibrutinib. *J Clin Oncol* 2017;35(26):3010-20. doi: 10.1200/JCO.2017.72.8519 [published Online First: 2017/07/18]
37. Casadei B, Argnani L, Guadagnuolo S, et al. Real World Evidence of CAR T-Cell Therapies for the Treatment of Relapsed/Refractory B-Cell Non-Hodgkin Lymphoma: A Monocentric Experience. *Cancers (Basel)* 2021;13(19) doi: 10.3390/cancers13194789 [published Online First: 20210924]
38. Wang J, Mou N, Yang Z, et al. Efficacy and safety of humanized anti-CD19-CAR-T therapy following intensive lymphodepleting chemotherapy for refractory/relapsed B acute lymphoblastic leukaemia. *Br J Haematol* 2020;191(2):212-22. doi: 10.1111/bjh.16623 [published Online First: 2020/04/02]
39. Zhou X, Tu S, Wang C, et al. Phase I Trial of Fourth-Generation Anti-CD19 Chimeric Antigen Receptor T Cells Against Relapsed or Refractory B Cell Non-Hodgkin Lymphomas. *Front Immunol* 2020;11:564099. doi: 10.3389/fimmu.2020.564099 [published Online First: 2020/12/18]
40. Hirayama AV, Gauthier J, Hay KA, et al. High rate of durable complete remission in follicular lymphoma after CD19 CAR-T cell immunotherapy. *Blood* 2019;134(7):636-40. doi: 10.1182/blood.2019000905 [published Online First: 2019/10/28]
41. Geyer MB, Riviere I, Senechal B, et al. Safety and tolerability of conditioning chemotherapy followed by CD19-targeted CAR T cells for relapsed/refractory CLL. *JCI Insight* 2019;5 doi: 10.1172/jci.insight.122627 [published Online First: 2019/04/03]
42. Rossi J, Paczkowski P, Shen YW, et al. Preinfusion polyfunctional anti-CD19 chimeric antigen receptor T cells are associated with clinical outcomes in NHL. *Blood* 2018;132(8):804-14. doi: 10.1182/blood-2018-01-828343 [published Online First: 2018/06/14]
43. Brudno JN, Lam N, Vanasse D, et al. Safety and feasibility of anti-CD19 CAR T cells with fully human binding domains in patients with B-cell lymphoma. *Nat Med* 2020;26(2):270-80. doi: 10.1038/s41591-019-0737-3 [published Online First: 2020/01/22]
44. Cui R, Lyu C, Li Q, et al. Humanized anti-CD19 chimeric antigen receptor-T cell therapy is safe and effective in lymphoma and leukemia patients with chronic and resolved hepatitis B virus infection. *Hematol Oncol* 2021;39(1):75-86. doi: 10.1002/hon.2807 [published Online First: 2020/09/20]

45. Roddie C, Dias J, O'Reilly MA, et al. Durable Responses and Low Toxicity After Fast Off-Rate CD19 Chimeric Antigen Receptor-T Therapy in Adults With Relapsed or Refractory B-Cell Acute Lymphoblastic Leukemia. *J Clin Oncol* 2021;39(30):3352-63. doi: 10.1200/JCO.21.00917 [published Online First: 20210831]
46. Gill SI, Vides V, Frey NV, et al. Anti-CD19 CAR T Cells in Combination with Ibrutinib for the Treatment of Chronic Lymphocytic Leukemia. *Blood Adv* 2022 doi: 10.1182/bloodadvances.2022007317 [published Online First: 20220329]
47. Wang CM, Wu ZQ, Wang Y, et al. Autologous T Cells Expressing CD30 Chimeric Antigen Receptors for Relapsed or Refractory Hodgkin Lymphoma: An Open-Label Phase I Trial. *Clin Cancer Res* 2017;23(5):1156-66. doi: 10.1158/1078-0432.CCR-16-1365 [published Online First: 2016/09/02]
48. Wang D, Wang J, Hu G, et al. A phase 1 study of a novel fully human BCMA-targeting CAR (CT103A) in patients with relapsed/refractory multiple myeloma. *Blood* 2021;137(21):2890-901. doi: 10.1182/blood.2020008936
49. Cao J, Wang G, Cheng H, et al. Potent anti-leukemia activities of humanized CD19-targeted Chimeric antigen receptor T (CAR-T) cells in patients with relapsed/refractory acute lymphoblastic leukemia. *Am J Hematol* 2018;93(7):851-58. doi: 10.1002/ajh.25108 [published Online First: 20180428]
50. Xu J, Chen LJ, Yang SS, et al. Exploratory trial of a biepitopic CAR T-targeting B cell maturation antigen in relapsed/refractory multiple myeloma. *Proc Natl Acad Sci U S A* 2019;116(19):9543-51. doi: 10.1073/pnas.1819745116 [published Online First: 2019/04/17]
51. Cornell RF, Bishop MR, Kumar S, et al. A phase 1, multicenter study evaluating the safety and efficacy of KITE-585, an autologous anti-BCMA CAR T-cell therapy, in patients with relapsed/refractory multiple myeloma. *Am J Cancer Res* 2021;11(6):3285-93. [published Online First: 20210615]
52. Wang X, Popplewell LL, Wagner JR, et al. Phase 1 studies of central memory-derived CD19 CAR T-cell therapy following autologous HSCT in patients with B-cell NHL. *Blood* 2016;127(24):2980-90. doi: 10.1182/blood-2015-12-686725 [published Online First: 2016/04/28]
53. Ramos CA, Savoldo B, Torrano V, et al. Clinical responses with T lymphocytes targeting malignancy-associated kappa light chains. *J Clin Invest* 2016;126(7):2588-96. doi: 10.1172/JCI86000 [published Online First: 2016/06/09]
54. Davila ML, Riviere I, Wang X, et al. Efficacy and toxicity management of 19-28z CAR T cell therapy in B cell acute lymphoblastic leukemia. *Sci Transl Med* 2014;6(224):224ra25. doi: 10.1126/scitranslmed.3008226 [published Online First: 2014/02/21]
55. Sauter CS, Senechal B, Riviere I, et al. CD19 CAR T cells following autologous transplantation in poor-risk relapsed and refractory B-cell non-Hodgkin lymphoma. *Blood* 2019;134(7):626-35. doi: 10.1182/blood.2018883421 [published Online First: 2019/07/03]
56. Hu Y, Wu Z, Luo Y, et al. Potent Anti-leukemia Activities of Chimeric Antigen Receptor-Modified T Cells against CD19 in Chinese Patients with Relapsed/Refractory Acute Lymphocytic Leukemia. *Clin Cancer Res* 2017;23(13):3297-306. doi: 10.1158/1078-0432.CCR-16-1799 [published Online First: 2017/01/01]
57. Porter DL, Hwang WT, Frey NV, et al. Chimeric antigen receptor T cells persist and induce sustained remissions in relapsed refractory chronic lymphocytic leukemia. *Sci Transl Med* 2015;7(303):303ra139. doi: 10.1126/scitranslmed.aac5415 [published Online First: 2015/09/04]
58. Frigault MJ, Bishop MR, Rosenblatt J, et al. Phase 1 Study of CART-ddBCMA for the treatment of subjects with relapsed and refractory multiple myeloma. *Blood Adv* 2022 doi: 10.1182/bloodadvances.2022007210 [published Online First: 20220425]
59. Baumeister SH, Murad J, Werner L, et al. Phase I Trial of Autologous CAR T Cells Targeting NKG2D Ligands in Patients with AML/MDS and Multiple Myeloma. *Cancer Immunol Res* 2019;7(1):100-12. doi: 10.1158/2326-6066.CIR-18-0307 [published Online First: 2018/11/07]



60. Ali SA, Shi V, Maric I, et al. T cells expressing an anti-B-cell maturation antigen chimeric antigen receptor cause remissions of multiple myeloma. *Blood* 2016;128(13):1688-700. doi: 10.1182/blood-2016-04-711903 [published Online First: 2016/07/15]
61. Enblad G, Karlsson H, Gammellgard G, et al. A Phase I/IIa Trial Using CD19-Targeted Third-Generation CAR T Cells for Lymphoma and Leukemia. *Clin Cancer Res* 2018;24(24):6185-94. doi: 10.1158/1078-0432.CCR-18-0426 [published Online First: 2018/08/12]
62. Yan ZX, Li L, Wang W, et al. Clinical Efficacy and Tumor Microenvironment Influence in a Dose-Escalation Study of Anti-CD19 Chimeric Antigen Receptor T Cells in Refractory B-Cell Non-Hodgkin's Lymphoma. *Clin Cancer Res* 2019;25(23):6995-7003. doi: 10.1158/1078-0432.CCR-19-0101 [published Online First: 2019/08/25]
63. Magnani CF, Gaipa G, Lussana F, et al. Sleeping Beauty-engineered CAR T cells achieve antileukemic activity without severe toxicities. *J Clin Invest* 2020;130(11):6021-33. doi: 10.1172/JCI138473 [published Online First: 2020/08/12]
64. Gu R, Liu F, Zou D, et al. Efficacy and safety of CD19 CAR T constructed with a new anti-CD19 chimeric antigen receptor in relapsed or refractory acute lymphoblastic leukemia. *J Hematol Oncol* 2020;13(1):122. doi: 10.1186/s13045-020-00953-8 [published Online First: 2020/09/08]
65. Geyer MB, Riviere I, Senchal B, et al. Autologous CD19-Targeted CAR T Cells in Patients with Residual CLL following Initial Purine Analog-Based Therapy. *Mol Ther* 2018;26(8):1896-905. doi: 10.1016/j.ymthe.2018.05.018 [published Online First: 2018/06/19]
66. Cruz CR, Micklethwaite KP, Savoldo B, et al. Infusion of donor-derived CD19-redirected virus-specific T cells for B-cell malignancies relapsed after allogeneic stem cell transplant: a phase 1 study. *Blood* 2013;122(17):2965-73. doi: 10.1182/blood-2013-06-506741 [published Online First: 2013/09/14]
67. Kochenderfer JN, Dudley ME, Feldman SA, et al. B-cell depletion and remissions of malignancy along with cytokine-associated toxicity in a clinical trial of anti-CD19 chimeric-antigen-receptor-transduced T cells. *Blood* 2012;119(12):2709-20. doi: 10.1182/blood-2011-10-384388 [published Online First: 2011/12/14]
68. Bao F, Wan W, He T, et al. Autologous CD19-directed chimeric antigen receptor-T cell is an effective and safe treatment to refractory or relapsed diffuse large B-cell lymphoma. *Cancer Gene Ther* 2019;26(7-8):248-55. doi: 10.1038/s41417-018-0073-7 [published Online First: 2019/01/10]
69. Eom HS, Choi BK, Lee Y, et al. Phase I Clinical Trial of 4-1BB-based Adoptive T-Cell Therapy for Epstein-Barr Virus (EBV)-positive Tumors. *J Immunother* 2016;39(3):140-8. doi: 10.1097/CJI.000000000000113 [published Online First: 2016/03/05]
70. Ritchie DS, Neeson PJ, Khot A, et al. Persistence and efficacy of second generation CAR T cell against the LeY antigen in acute myeloid leukemia. *Mol Ther* 2013;21(11):2122-9. doi: 10.1038/mt.2013.154 [published Online First: 2013/07/09]
71. Zhang Q, Hu H, Chen SY, et al. Transcriptome and Regulatory Network Analyses of CD19-CAR-T Immunotherapy for B-ALL. *Genomics Proteomics Bioinformatics* 2019;17(2):190-200. doi: 10.1016/j.gpb.2018.12.008 [published Online First: 2019/06/16]
72. Kalos M, Levine BL, Porter DL, et al. T cells with chimeric antigen receptors have potent antitumor effects and can establish memory in patients with advanced leukemia. *Sci Transl Med* 2011;3(95):95ra73. doi: 10.1126/scitranslmed.3002842 [published Online First: 2011/08/13]
73. Weng J, Lai P, Qin L, et al. A novel generation 1928zT2 CAR T cells induce remission in extramedullary relapse of acute lymphoblastic leukemia. *J Hematol Oncol* 2018;11(1):25. doi: 10.1186/s13045-018-0572-x [published Online First: 2018/02/21]
74. Feng J, Xu H, Cinquina A, et al. Treatment of Aggressive T Cell Lymphoblastic Lymphoma/leukemia Using Anti-CD5 CAR T Cells. *Stem Cell Rev Rep* 2021;17(2):652-61. doi: 10.1007/s12015-020-10092-9 [published Online First: 2021/01/06]



75. Meader N, King K, Llewellyn A, et al. A checklist designed to aid consistency and reproducibility of GRADE assessments: development and pilot validation. *Syst Rev* 2014;3:82. doi: 10.1186/2046-4053-3-82 [published Online First: 20140724]
76. Guyatt GH, Oxman AD, Kunz R, et al. GRADE guidelines 6. Rating the quality of evidence--imprecision. *J Clin Epidemiol* 2011;64(12):1283-93. doi: 10.1016/j.jclinepi.2011.01.012 [published Online First: 20110811]
77. Guyatt GH, Oxman AD, Kunz R, et al. GRADE guidelines: 8. Rating the quality of evidence--indirectness. *J Clin Epidemiol* 2011;64(12):1303-10. doi: 10.1016/j.jclinepi.2011.04.014 [published Online First: 20110730]
78. Guyatt GH, Oxman AD, Vist G, et al. GRADE guidelines: 4. Rating the quality of evidence--study limitations (risk of bias). *J Clin Epidemiol* 2011;64(4):407-15. doi: 10.1016/j.jclinepi.2010.07.017 [published Online First: 20110119]
